# Supplementary material
Source: publisher site journal article supplement (https://www.spandidos-publications.com/7585/downloadSupplementary)
Supplement: Supplementary file 1 [file downloadSupplementary]

## Sheet: Table S1
Table SI. A total of 1,004 genes were identified.
Gene ID	Log2(FC)	P-value	Regulation
Cks1b	-1.13835	1.0x10^-10	Down
Gna12	-1.07357	1.0x10^-12	Down
Dct	-2.31378	1.0x10^-13	Down
Abcg8	1.0479	1.0x10^-14	Up
Zfp652	-1.14392	1.0x10^-15	Down
Tgfbr3l	1.54919	1.0x10^-15	Up
Pim3	1.06776	1.0x10^-16	Up
Dennd6a	-1.10149	1.0x10^-17	Down
Dock1	-1.12226	1.0x10^-17	Down
Cad	-1.15129	1.0x10^-18	Down
Mettl27	1.28639	1.0x10^-18	Up
Wdr7	-1.15863	1.0x10^-18	Down
Cyp2j8	2.66425	1.0x10^-2	Up
Actn2	3.73454	1.0x10^-2	Up
Wt1	1.1629	1.0x10^-2	Up
Melk	-2.09437	1.0x10^-2	Down
Cish	1.92538	1.0x10^-2	Up
Def6	1.03727	1.0x10^-2	Up
Abca14	1.89924	1.0x10^-2	Up
Dpy19l3	-1.36322	1.0x10^-20	Down
Rpl27a-ps4	1.59693	1.0x10^-3	Up
Npff	1.25099	1.0x10^-3	Up
Aldh1l2	2.24505	1.0x10^-3	Up
Tgm1	1.17018	1.0x10^-3	Up
Ckap2l	-1.60645	1.0x10^-3	Down
Espn	1.18886	1.0x10^-3	Up
LOC118568281	1.53492	1.0x10^-3	Up
Zfp641	1.61324	1.0x10^-3	Up
Kif11	-1.05457	1.0x10^-3	Down
Cpd	-1.07927	1.0x10^-31	Down
Rnf149	-1.00699	1.0x10^-34	Down
P3h4	1.26224	1.0x10^-4	Up
H2-Ob	1.38985	1.0x10^-4	Up
Car11	1.66947	1.0x10^-4	Up
Cyp4a32	1.15377	1.0x10^-4	Up
Bag3	-1.98613	1.0x10^-45	Down
Stac3	1.67096	1.0x10^-5	Up
Loxl1	1.05891	1.0x10^-5	Up
Pld6	1.35282	1.0x10^-5	Up
Gpat2	1.11368	1.0x10^-5	Up
Sult1c2	1.32973	1.0x10^-5	Up
Dgkh	1.05698	1.0x10^-6	Up
Nlrp1b	1.48606	1.0x10^-6	Up
Olfm3	-1.29436	1.0x10^-6	Down
Mup21	-4.54883	1.0x10^-60	Down
F3	1.17219	1.0x10^-8	Up
Acad12	-1.31747	1.0x10^-8	Down
Abtb2	-1.07734	1.1x10^-10	Down
Zswim1	-1.18193	1.1x10^-10	Down
Zfp707	1.09214	1.1x10^-13	Up
Rnf125	-1.18581	1.1x10^-13	Down
Xpo4	-1.13296	1.1x10^-13	Down
Mtf1	-1.08414	1.1x10^-15	Down
Hbb-bt	1.53504	1.1x10^-16	Up
Colca2	2.32443	1.1x10^-2	Up
Fam221a	2.54239	1.1x10^-2	Up
Psd	1.02082	1.1x10^-2	Up
Pou2af1	1.30378	1.1x10^-2	Up
Gm13420	1.31889	1.1x10^-2	Up
Upp2	1.25289	1.1x10^-2	Up
Osr1	2.11203	1.1x10^-2	Up
Armcx6	-1.41837	1.1x10^-2	Down
Tff2	1.61462	1.1x10^-2	Up
Efcab12	1.75743	1.1x10^-2	Up
Bmp10	-1.56651	1.1x10^-2	Down
Flnc	1.1839	1.1x10^-2	Up
Mmp3	2.88149	1.1x10^-2	Up
Eif2ak3	-1.61415	1.1x10^-24	Down
C1galt1	-1.55851	1.1x10^-27	Down
Myh11	1.27074	1.1x10^-3	Up
Adamts4	-1.55131	1.1x10^-3	Down
Ace2	-3.23934	1.1x10^-3	Down
Kcnt2	-1.19812	1.1x10^-3	Down
Fndc1	1.21922	1.1x10^-3	Up
Cpt1c	1.30143	1.1x10^-3	Up
Gm2808	-2.15536	1.1x10^-3	Down
Mogat2	1.4325	1.1x10^-3	Up
Gm38664	1.17366	1.1x10^-3	Up
Cyp17a1	2.91778	1.1x10^-30	Up
Slc16a11	1.44822	1.1x10^-33	Up
Cgnl1	-1.03385	1.1x10^-36	Down
Chchd10	1.1022	1.1x10^-37	Up
Cdkn1c	1.20857	1.1x10^-4	Up
Gnai1	-1.36299	1.1x10^-4	Down
Pim1	1.04892	1.1x10^-4	Up
Lrrd1	1.42858	1.1x10^-4	Up
Ube3c	-1.36983	1.1x10^-47	Down
Tmeff2	-2.985	1.1x10^-5	Down
Slc22a17	1.39521	1.1x10^-5	Up
Hspb7	2.61623	1.1x10^-5	Up
Misp3	4.65555	1.1x10^-5	Up
Mical1	1.19484	1.1x10^-6	Up
LOC115488130	1.24498	1.1x10^-7	Up
Fzd6	1.30593	1.2x10^-10	Up
Pik3r3	-1.41488	1.2x10^-10	Down
Golph3l	-1.33003	1.2x10^-12	Down
C2cd2l	-1.13998	1.2x10^-15	Down
Tmod1	1.94884	1.2x10^-2	Up
Ifitm10	1.19471	1.2x10^-2	Up
Dnajc27	1.07993	1.2x10^-2	Up
Uhrf1	-1.1706	1.2x10^-2	Down
C1qtnf7	1.15891	1.2x10^-2	Up
Trim10	3.49308	1.2x10^-2	Up
Cd247	1.02265	1.2x10^-2	Up
Retn	3.47726	1.2x10^-2	Up
Kcnj10	-1.88169	1.2x10^-2	Down
Nfatc3	-1.00472	1.2x10^-21	Down
Snap23	-1.48324	1.2x10^-22	Down
Esr1	-2.65556	1.2x10^-22	Down
Selenbp2	-1.30964	1.2x10^-23	Down
Slc25a27	2.46404	1.2x10^-25	Up
Sec23b	-1.03287	1.2x10^-26	Down
Ranbp2	-1.22798	1.2x10^-28	Down
Ddx6	-1.10748	1.2x10^-29	Down
Prr11	-2.94299	1.2x10^-3	Down
Mpp2	1.4989	1.2x10^-3	Up
Aph1c	1.03227	1.2x10^-3	Up
Ficd	-1.52687	1.2x10^-34	Down
Kpna1	-1.35144	1.2x10^-35	Down
Zhx1	-1.34645	1.2x10^-39	Down
LOC118568094	1.16734	1.2x10^-4	Up
Smarcd3	1.25278	1.2x10^-5	Up
Ccdc149	-1.05469	1.2x10^-6	Down
Ankrd37	2.49655	1.2x10^-6	Up
Cd79a	1.32398	1.2x10^-6	Up
Cspg5	1.09381	1.2x10^-6	Up
Atp2b2	1.20188	1.2x10^-7	Up
Azin2	2.41906	1.2x10^-8	Up
Eva1b	1.06395	1.3x10^-10	Up
Chrm3	-2.55507	1.3x10^-11	Down
Banp	-1.06473	1.3x10^-15	Down
Ubqln2	-1.01829	1.3x10^-16	Down
Piga	-1.50146	1.3x10^-17	Down
Enho	-1.30908	1.3x10^-18	Down
Ccl22	1.60171	1.3x10^-2	Up
Gm29797	1.47897	1.3x10^-2	Up
AI467606	1.0673	1.3x10^-2	Up
Gcnt1	1.11056	1.3x10^-2	Up
Cd27	1.1564	1.3x10^-2	Up
Diaph3	-1.83085	1.3x10^-2	Down
Zfand2a	-1.42226	1.3x10^-26	Down
Fnbp1l	-1.03499	1.3x10^-28	Down
Blvrb	1.23137	1.3x10^-29	Up
Barhl1	2.77603	1.3x10^-3	Up
Card14	2.21624	1.3x10^-3	Up
Tmem191c	1.17078	1.3x10^-3	Up
Ccdc114	2.0173	1.3x10^-3	Up
Racgap1	-1.1615	1.3x10^-3	Down
Mroh2a	1.22168	1.3x10^-3	Up
Anln	-1.20606	1.3x10^-3	Down
Palld	-1.449	1.3x10^-32	Down
Adam9	-1.23077	1.3x10^-38	Down
Catsperg1	2.22455	1.3x10^-4	Up
Pcdhgc3	-1.14324	1.3x10^-4	Down
Plk3	1.41462	1.3x10^-4	Up
Zfp647	1.34865	1.3x10^-4	Up
Srp54a	-1.23087	1.3x10^-5	Down
Lepr	1.40932	1.3x10^-7	Up
Mcm4	-1.00541	1.3x10^-9	Down
N4bp2l1	1.23928	1.3x10^-9	Up
Fads3	1.03239	1.3x10^-9	Up
Cyp2b9	3.90765	1.4x10^-11	Up
Clpx	-1.04102	1.4x10^-12	Down
Spp1	-1.27829	1.4x10^-13	Down
Slc12a9	1.02454	1.4x10^-13	Up
Kctd7	-1.46785	1.4x10^-13	Down
Ppp1r3g	2.5783	1.4x10^-2	Up
Adamtsl3	-3.13388	1.4x10^-2	Down
Fbxl2	3.36769	1.4x10^-2	Up
Cfap100	1.83641	1.4x10^-2	Up
Cd209f	2.32575	1.4x10^-2	Up
Espl1	-1.3938	1.4x10^-2	Down
Itgae	1.26115	1.4x10^-2	Up
Ccdc24	1.91524	1.4x10^-2	Up
Capza1	-1.51028	1.4x10^-25	Down
Ddi2	-1.30642	1.4x10^-28	Down
Sncaip	-1.50911	1.4x10^-3	Down
Mtus2	-1.12474	1.4x10^-3	Down
Arhgap11a	-1.04089	1.4x10^-3	Down
Xlr4b	2.87781	1.4x10^-3	Up
Vinac1	1.47623	1.4x10^-3	Up
Hapln1	-2.04413	1.4x10^-4	Down
Apoa4	1.60904	1.4x10^-41	Up
Mki67	-1.42544	1.4x10^-6	Down
Tmem28	-1.97236	1.4x10^-6	Down
Mapk15	1.57523	1.4x10^-6	Up
Per3	3.3122	1.4x10^-8	Up
Sgce	1.18632	1.5x10^-10	Up
Fbxo33	-1.06486	1.5x10^-15	Down
Il6st	-1.11804	1.5x10^-16	Down
Cebpb	1.05557	1.5x10^-17	Up
Chkb	1.00573	1.5x10^-18	Up
Shcbp1	-1.4517	1.5x10^-2	Down
Rhox5	2.25877	1.5x10^-2	Up
Cd46	1.11841	1.5x10^-2	Up
Ryr1	2.65356	1.5x10^-2	Up
Cacnb2	1.25629	1.5x10^-2	Up
Klk8	1.56673	1.5x10^-2	Up
Lingo4	-1.74951	1.5x10^-2	Down
Lrrc39	1.02167	1.5x10^-2	Up
A2m	-1.51759	1.5x10^-2	Down
Atp2a2	-1.01433	1.5x10^-20	Down
Soat2	1.07505	1.5x10^-26	Up
Slc10a2	-1.13373	1.5x10^-3	Down
Ell3	1.14822	1.5x10^-3	Up
Gm32234	2.86329	1.5x10^-3	Up
S100a4	1.58094	1.5x10^-3	Up
Gosr2	-1.02549	1.5x10^-37	Down
Eef1akmt3	-4.26695	1.5x10^-4	Down
Atp8b5	-1.76867	1.5x10^-4	Down
Npnt	1.68274	1.5x10^-4	Up
Atp4a	-1.46271	1.5x10^-4	Down
Tbc1d10c	1.34154	1.5x10^-4	Up
Vnn1	1.10826	1.5x10^-5	Up
Herpud1	-1.04878	1.5x10^-5	Down
Cyp2d34	1.68469	1.5x10^-5	Up
Dnah11	3.39191	1.5x10^-5	Up
Nrtn	1.65655	1.5x10^-5	Up
Chek1	-2.36027	1.5x10^-5	Down
Ccdc171	1.02914	1.5x10^-6	Up
Wfdc2	1.87854	1.5x10^-7	Up
Sema4b	1.1459	1.6x10^-10	Up
Saa1	-3.60075	1.6x10^-10	Down
Abcd2	1.65251	1.6x10^-12	Up
Lrp11	-2.23137	1.6x10^-12	Down
Ptprs	1.08082	1.6x10^-12	Up
Spata2l	1.03703	1.6x10^-12	Up
Prtn3	-1.06121	1.6x10^-2	Down
Ubash3a	1.71019	1.6x10^-2	Up
H2-Eb2	2.73037	1.6x10^-2	Up
Trpm5	1.67849	1.6x10^-2	Up
Gm10144	2.65033	1.6x10^-2	Up
Slc22a21	1.14383	1.6x10^-2	Up
Tubb4a	1.02706	1.6x10^-2	Up
Spa17	1.29943	1.6x10^-2	Up
Mup2	-1.20552	1.6x10^-2	Down
Vasn	-1.38416	1.6x10^-20	Down
Atp8b1	-1.04396	1.6x10^-23	Down
Tube1	1.03856	1.6x10^-3	Up
Actg2	1.36718	1.6x10^-3	Up
Cox7a1	1.15388	1.6x10^-3	Up
Agbl2	4.54621	1.6x10^-3	Up
Junb	1.28515	1.6x10^-3	Up
Nipal1	1.38335	1.6x10^-3	Up
Edem3	-1.36176	1.6x10^-30	Down
Fbln1	1.10776	1.6x10^-4	Up
Ttk	-4.02958	1.6x10^-4	Down
Il20rb	1.2582	1.6x10^-4	Up
Fcer2a	2.49663	1.6x10^-5	Up
Sftpa1	1.67158	1.6x10^-6	Up
Aldh3b1	1.06154	1.6x10^-6	Up
Epm2a	-2.90333	1.6x10^-7	Down
Gstm2	1.17647	1.6x10^-7	Up
Vegfd	1.36028	1.7x10^-10	Up
Cyb561	-1.36735	1.7x10^-12	Down
Ces2b	-2.81583	1.7x10^-14	Down
Paip2b	-1.27061	1.7x10^-17	Down
Itpr1	-1.04278	1.7x10^-18	Down
Cabyr	1.1035	1.7x10^-2	Up
Retnlg	2.68491	1.7x10^-2	Up
Zfp712	1.01857	1.7x10^-2	Up
Fxyd2	1.19182	1.7x10^-2	Up
LOC118568718	1.50608	1.7x10^-2	Up
Rps6kl1	1.02385	1.7x10^-2	Up
Tmem100	2.34954	1.7x10^-2	Up
Gm42372	2.35078	1.7x10^-2	Up
Brca1	-1.14493	1.7x10^-2	Down
Mgat3	1.53899	1.7x10^-2	Up
Ncoa4	-1.12962	1.7x10^-22	Down
Gins2	-1.29459	1.7x10^-3	Down
Npb	1.6648	1.7x10^-3	Up
Rad51	-2.32144	1.7x10^-3	Down
Mtmr4	-1.11119	1.7x10^-31	Down
Fabp1	1.15585	1.7x10^-33	Up
Gspt1	-1.01576	1.7x10^-35	Down
LOC115488470	1.81073	1.7x10^-4	Up
Ckap2	-1.7358	1.7x10^-4	Down
Cyp3a59	1.03759	1.7x10^-4	Up
Rnf4	-1.21949	1.7x10^-42	Down
Dag1	-1.10784	1.7x10^-43	Down
Krt23	1.7489	1.7x10^-5	Up
Tnnt1	1.7329	1.7x10^-6	Up
Mt1	3.63647	1.8x10^-11	Up
Ccdc117	-1.08196	1.8x10^-12	Down
Rnf186	1.37907	1.8x10^-13	Up
Dnaja4	-1.0451	1.8x10^-13	Down
Plcxd1	2.47641	1.8x10^-14	Up
Nr1i3	1.2047	1.8x10^-14	Up
Acmsd	-1.10434	1.8x10^-17	Down
Clec10a	1.19019	1.8x10^-2	Up
Eef1a2	2.19104	1.8x10^-2	Up
Npl	-1.29546	1.8x10^-2	Down
Ddias	-1.13231	1.8x10^-2	Down
Slc35f2	1.34303	1.8x10^-2	Up
Thap12	-1.0467	1.8x10^-25	Down
Ptprf	-1.32149	1.8x10^-25	Down
Zfp579	1.17975	1.8x10^-26	Up
Syt12	-1.39227	1.8x10^-3	Down
Adamts14	1.05201	1.8x10^-3	Up
Nudt15	-1.70784	1.8x10^-3	Down
Car15	1.6518	1.8x10^-4	Up
Fhad1	1.09801	1.8x10^-4	Up
Hap1	1.08365	1.8x10^-5	Up
Pabpn1	1.1203	1.8x10^-5	Up
Osbp	-1.10809	1.8x10^-60	Down
Des	1.04609	1.8x10^-8	Up
Acta2	1.2865	1.8x10^-9	Up
Hba-a1	1.38753	1.8x10^-9	Up
Ints2	-1.18047	1.9x10^-11	Down
Adamtsl5	2.05065	1.9x10^-11	Up
Cnnm1	1.62937	1.9x10^-2	Up
Cox8b	3.57741	1.9x10^-2	Up
Cdca2	-1.13566	1.9x10^-2	Down
Hs3st1	1.17567	1.9x10^-2	Up
S100a14	3.27118	1.9x10^-2	Up
Cyp26a1	1.78892	1.9x10^-2	Up
Esm1	-1.67145	1.9x10^-2	Down
Podxl2	1.67842	1.9x10^-2	Up
Mettl7a3	1.71326	1.9x10^-2	Up
F13b	-1.08388	1.9x10^-20	Down
Tbc1d8b	-1.15458	1.9x10^-20	Down
Pcsk4	1.60548	1.9x10^-22	Up
Kifc1	-1.991	1.9x10^-3	Down
Scd3	-4.67969	1.9x10^-3	Down
Rem2	2.92159	1.9x10^-3	Up
Sec24c	-1.19136	1.9x10^-38	Down
Iqank1	1.81225	1.9x10^-4	Up
Fut1	4.95372	1.9x10^-5	Up
Hddc3	1.01805	1.9x10^-5	Up
Cphx1	1.04357	1.9x10^-5	Up
Slc25a47	1.02167	1.9x10^-5	Up
Abcb1a	1.0022	1.9x10^-5	Up
Dlec1	1.07769	1.9x10^-5	Up
Tnfaip3	-1.64299	1.9x10^-8	Down
Atad2	-1.11774	1.9x10^-8	Down
Gpc1	-1.09673	2.0x10^-13	Down
Trim37	-1.03905	2.0x10^-14	Down
Ccnd1	-1.26828	2.0x10^-16	Down
Tmem221	1.48183	2.0x10^-2	Up
Angptl7	1.18444	2.0x10^-2	Up
Satb1	1.01705	2.0x10^-2	Up
Gli1	1.76862	2.0x10^-2	Up
Phf11a	1.28588	2.0x10^-2	Up
Cyp2c69	1.43303	2.0x10^-2	Up
Slit2	1.97128	2.0x10^-2	Up
Olfr1393	1.28491	2.0x10^-2	Up
Adam4	1.05611	2.0x10^-2	Up
Gtf2e1	-1.38214	2.0x10^-26	Down
Tnpo1	-1.29775	2.0x10^-36	Down
Dpep1	1.30066	2.0x10^-4	Up
Steap4	-1.22014	2.0x10^-4	Down
Ripor2	1.08319	2.0x10^-4	Up
Ahnak2	1.34777	2.0x10^-4	Up
Lcn2	-1.60798	2.0x10^-4	Down
Gngt1	1.91677	2.0x10^-6	Up
Sult4a1	4.23756	2.0x10^-8	Up
Gstm3	2.08835	2.0x10^-9	Up
Htatip2	1.25324	2.1x10^-17	Up
Hcn3	1.64801	2.1x10^-2	Up
Crhr2	1.86433	2.1x10^-2	Up
Ttc16	2.05368	2.1x10^-2	Up
Kcnk3	1.07216	2.1x10^-2	Up
Pianp	1.16389	2.1x10^-2	Up
Pcdh17	-1.26854	2.1x10^-2	Down
Cpne3	-1.02666	2.1x10^-26	Down
Ecm2	1.08156	2.1x10^-3	Up
Foxm1	-1.16309	2.1x10^-3	Down
Grhl1	-1.03654	2.1x10^-3	Down
Blk	2.53292	2.1x10^-3	Up
Kif18b	-2.43865	2.1x10^-3	Down
Mis12	-1.11438	2.1x10^-31	Down
Serpina6	1.1637	2.1x10^-33	Up
Vsig2	1.46177	2.1x10^-4	Up
Rufy4	1.81319	2.1x10^-4	Up
Caprin2	1.20678	2.1x10^-5	Up
Ptges	1.78949	2.1x10^-6	Up
Gsta2	1.43883	2.1x10^-7	Up
Tpm2	1.28272	2.2x10^-11	Up
Loxl4	-1.73863	2.2x10^-12	Down
Klf10	1.62784	2.2x10^-16	Up
Cacna1c	1.20607	2.2x10^-2	Up
Phf11c	1.29973	2.2x10^-2	Up
Pomc	2.30164	2.2x10^-2	Up
Klhl33	1.77423	2.2x10^-2	Up
6720489N17Rik	1.86138	2.2x10^-2	Up
Cdkn3	-1.83906	2.2x10^-2	Down
Zyg11b	-1.1146	2.2x10^-23	Down
Iglon5	1.58949	2.2x10^-3	Up
Smlr1	1.13948	2.2x10^-37	Up
Zfp9	-2.44765	2.2x10^-38	Down
1810024B03Rik	1.09994	2.2x10^-4	Up
Cyyr1	-1.2152	2.2x10^-4	Down
Plin1	4.65431	2.2x10^-5	Up
Lancl2	-1.04922	2.2x10^-9	Down
Grk5	-1.12569	2.2x10^-9	Down
Arfgap3	-1.50068	2.3x10^-14	Down
Ptp4a3	1.05015	2.3x10^-15	Up
Npas2	-1.26167	2.3x10^-2	Down
Fbxo2	1.01384	2.3x10^-2	Up
Bcl2a1b	1.05702	2.3x10^-2	Up
Spdl1	-1.44359	2.3x10^-2	Down
Pla2g12a	1.15843	2.3x10^-21	Up
Gmppb	-1.09845	2.3x10^-22	Down
Leng8	1.13355	2.3x10^-22	Up
LOC118568312	1.01492	2.3x10^-3	Up
Abcc12	1.92405	2.3x10^-3	Up
Ipo7	-1.04676	2.3x10^-33	Down
Rfwd3	-1.23434	2.3x10^-38	Down
Trip12	-1.01271	2.3x10^-39	Down
Oxr1	-1.09195	2.3x10^-39	Down
Akap5	1.29928	2.3x10^-4	Up
Srrm4	1.30327	2.3x10^-6	Up
Ctps	-1.01324	2.3x10^-6	Down
Ccdc152	1.50508	2.3x10^-6	Up
Rec8	1.30973	2.3x10^-7	Up
Orm2	-2.85973	2.3x10^-7	Down
Plcb1	-1.00064	2.3x10^-8	Down
Pced1b	1.29998	2.4x10^-12	Up
Inmt	1.13572	2.4x10^-14	Up
Slc26a10	1.15774	2.4x10^-15	Up
F830016B08Rik	1.04264	2.4x10^-17	Up
Fitm2	-1.52865	2.4x10^-25	Down
Pdcl	-1.16513	2.4x10^-27	Down
Mthfr	-1.08862	2.4x10^-3	Down
Gm3776	1.7209	2.4x10^-3	Up
Knl1	-2.01516	2.4x10^-3	Down
Gdf15	1.83742	2.4x10^-3	Up
Btbd11	-1.18269	2.4x10^-3	Down
Uhmk1	-1.02033	2.4x10^-36	Down
Cacng7	1.11479	2.4x10^-4	Up
Tpx2	-1.83962	2.4x10^-5	Down
Cd37	1.04555	2.4x10^-5	Up
Zfp867	1.07028	2.4x10^-5	Up
Ntn4	-1.44985	2.4x10^-6	Down
Hsbp1l1	1.37634	2.4x10^-7	Up
Csrnp1	1.44396	2.4x10^-8	Up
Gvin1	-1.73833	2.4x10^-8	Down
Zfp324	-1.21671	2.5x10^-11	Down
Hspa1b	-2.51473	2.5x10^-14	Down
Mt2	5.48572	2.5x10^-29	Up
Pln	3.48929	2.5x10^-3	Up
Gipc2	2.12793	2.5x10^-3	Up
Chrdl2	2.01151	2.5x10^-3	Up
Ndst1	-1.02549	2.5x10^-35	Down
Ltc4s	1.66544	2.5x10^-4	Up
Alg10b	-2.16632	2.5x10^-42	Down
Reps2	-1.32789	2.5x10^-44	Down
Peg10	1.47485	2.5x10^-5	Up
Dpysl2	1.13647	2.5x10^-7	Up
Rbl1	-1.3108	2.5x10^-7	Down
Crip1	1.03804	2.6x10^-11	Up
Eif1a	-1.02886	2.6x10^-18	Down
Agmo	-1.16504	2.6x10^-19	Down
Togaram1	-1.12334	2.6x10^-21	Down
Myo1b	-1.11831	2.6x10^-23	Down
Kpna3	-1.03683	2.6x10^-24	Down
Rdx	-1.04365	2.6x10^-28	Down
Kdm1b	-1.12433	2.6x10^-29	Down
LOC118567927	-1.65303	2.6x10^-3	Down
Atf3	1.15118	2.6x10^-3	Up
Gm46650	1.70695	2.6x10^-3	Up
Ibtk	-1.46116	2.6x10^-32	Down
6430548M08Rik	-1.13167	2.6x10^-8	Down
Spaca6	1.7215	2.7x10^-10	Up
Rrp8	-1.06456	2.7x10^-10	Down
Nt5dc3	-1.05158	2.7x10^-11	Down
Hsph1	-1.57022	2.7x10^-12	Down
Ppl	-1.231	2.7x10^-12	Down
Dcp2	-1.04202	2.7x10^-12	Down
Ero1a	-1.12491	2.7x10^-15	Down
Plppr2	1.12445	2.7x10^-22	Up
Gtf3c4	-1.23718	2.7x10^-27	Down
Megf9	-2.76223	2.7x10^-27	Down
Ly6g5b	2.00091	2.7x10^-3	Up
Ndrg4	1.75503	2.7x10^-3	Up
Star	1.01378	2.7x10^-3	Up
Plekhn1	1.40358	2.7x10^-4	Up
Gm41408	1.48786	2.7x10^-4	Up
Nr1d1	2.47558	2.7x10^-5	Up
Abat	-1.0125	2.8x10^-22	Down
Nscme3l	2.2313	2.8x10^-3	Up
Sphk1	1.68946	2.8x10^-3	Up
Tceal3	3.946	2.8x10^-3	Up
Edem1	-1.15181	2.8x10^-34	Down
Slc35e1	-1.29319	2.8x10^-35	Down
Wnt4	1.20081	2.8x10^-4	Up
Zfp366	-1.68391	2.8x10^-4	Down
Tnik	-1.4119	2.8x10^-6	Down
Prss8	1.07274	2.8x10^-8	Up
Kifc2	1.17988	2.9x10^-10	Up
Tgtp1	-1.11872	2.9x10^-10	Down
Ankib1	-1.15032	2.9x10^-28	Down
Cald1	-1.05861	2.9x10^-30	Down
Ppard	-1.92323	2.9x10^-30	Down
Cd300lf	1.44564	2.9x10^-6	Up
Ccnb1	-2.90482	2.9x10^-7	Down
Cpt1b	1.07762	2.9x10^-8	Up
Vldlr	1.99268	3.0x10^-10	Up
Ahcyl2	-1.15825	3.0x10^-11	Down
Robo1	-2.14146	3.0x10^-14	Down
Polr3b	-1.00216	3.0x10^-20	Down
Ubfd1	-1.10816	3.0x10^-25	Down
Ppp1r3c	-1.71558	3.0x10^-31	Down
Tm9sf3	-1.06747	3.0x10^-38	Down
C1qtnf12	1.39382	3.0x10^-4	Up
AI413582	1.02454	3.0x10^-4	Up
Tifa	-1.03969	3.0x10^-6	Down
Cirbp	1.16771	3.1x10^-14	Up
Zfp790	-1.11082	3.1x10^-14	Down
Rbp1	-1.14205	3.1x10^-15	Down
Garem1	-1.09554	3.1x10^-23	Down
Oxnad1	-1.08855	3.1x10^-25	Down
Apbb1	1.23271	3.1x10^-3	Up
Ms4a4c	1.49737	3.1x10^-3	Up
Serpina5	-2.22982	3.1x10^-3	Down
Akr1c18	2.08048	3.1x10^-3	Up
Rps15a-ps5	2.13426	3.1x10^-3	Up
Eml6	-1.27754	3.1x10^-4	Down
Spata24	1.45465	3.1x10^-5	Up
Kcnab3	1.43444	3.1x10^-5	Up
Susd4	-2.16909	3.1x10^-54	Down
Wdr76	-1.0518	3.1x10^-6	Down
Chic1	-1.61752	3.1x10^-7	Down
Cry1	-1.1772	3.1x10^-7	Down
Sox12	1.14585	3.1x10^-8	Up
Scara5	-3.73691	3.1x10^-9	Down
Adgre1	-1.58801	3.2x10^-10	Down
Tab1	1.02447	3.2x10^-10	Up
Creb3l2	-1.66373	3.2x10^-19	Down
Sel1l	-1.16946	3.2x10^-24	Down
Eif2s3x	-1.83077	3.2x10^-27	Down
Fjx1	3.67461	3.2x10^-3	Up
Pcdhgb6	-2.81286	3.2x10^-3	Down
Plcd3	1.27149	3.2x10^-4	Up
4933411K16Rik	1.26746	3.2x10^-6	Up
Tcf24	2.5252	3.2x10^-6	Up
Proca1	1.04627	3.2x10^-8	Up
Eml5	1.03816	3.3x10^-10	Up
Tmem88b	1.6014	3.3x10^-10	Up
Elmod2	-1.06414	3.3x10^-19	Down
Pik3c2a	-1.21874	3.3x10^-27	Down
Unc93a2	1.02894	3.3x10^-3	Up
Mapk4	1.30306	3.3x10^-3	Up
Mab21l4	2.18351	3.3x10^-3	Up
Lyz1	1.8086	3.3x10^-3	Up
Ncapg	-2.20802	3.3x10^-4	Down
Cyp4a31	1.65361	3.3x10^-5	Up
D130043K22Rik	1.21791	3.3x10^-5	Up
Hmmr	-2.37427	3.3x10^-5	Down
Extl1	1.40602	3.4x10^-11	Up
Sorbs2	-1.01316	3.4x10^-20	Down
Klf11	1.35158	3.4x10^-22	Up
Fdft1	1.1174	3.4x10^-22	Up
Cyp2c38	1.55264	3.4x10^-28	Up
Slit1	1.4953	3.4x10^-3	Up
Spib	1.34953	3.4x10^-3	Up
Pgpep1l	1.6494	3.4x10^-3	Up
Lrrc17	3.67355	3.4x10^-4	Up
Zfp970	1.35555	3.4x10^-5	Up
Aoc3	2.11414	3.4x10^-7	Up
Nqo1	1.42894	3.4x10^-9	Up
Ago2	-1.20098	3.5x10^-10	Down
Angptl4	1.53942	3.5x10^-11	Up
Gstp3	1.00859	3.5x10^-11	Up
Gadd45a	2.53108	3.5x10^-12	Up
Dbp	5.80618	3.5x10^-14	Up
Psat1	2.80691	3.5x10^-15	Up
Pm20d2	-1.17577	3.5x10^-16	Down
Acpp	-2.09141	3.5x10^-16	Down
Cbr1	1.30137	3.5x10^-27	Up
Ptprz1	3.34377	3.5x10^-3	Up
Retnla	3.36772	3.5x10^-3	Up
A930033H14Rik	1.98099	3.5x10^-3	Up
Wdr54	1.2298	3.5x10^-3	Up
Nsun7	1.8217	3.5x10^-3	Up
Eid3	2.24497	3.5x10^-3	Up
Aspn	2.01119	3.5x10^-4	Up
Cd248	1.23147	3.5x10^-4	Up
Sprn	1.38775	3.5x10^-5	Up
Zc3h6	1.90546	3.5x10^-6	Up
Gfod1	-1.27383	3.5x10^-7	Down
Nek8	1.2242	3.6x10^-11	Up
Acsl4	-1.06137	3.6x10^-12	Down
Nupr1	2.32624	3.6x10^-13	Up
Akap17b	-1.33515	3.6x10^-13	Down
Phf24	1.64247	3.6x10^-3	Up
Smc2	-1.06981	3.6x10^-5	Down
Ncam2	-1.44083	3.6x10^-6	Down
Olfm2	1.45247	3.6x10^-6	Up
E2f2	-1.28374	3.6x10^-7	Down
Fam81a	-1.48174	3.6x10^-7	Down
Hba-a2	1.44055	3.6x10^-8	Up
Tle2	1.05233	3.7x10^-13	Up
Tmem39a	-1.15675	3.7x10^-26	Down
Cux2	1.57743	3.7x10^-3	Up
Cercam	1.7947	3.7x10^-3	Up
Trim80	2.572	3.7x10^-5	Up
Rgs16	4.60788	3.8x10^-10	Up
Arhgap5	-1.04125	3.8x10^-14	Down
Vps37c	-1.02231	3.8x10^-21	Down
Cfd	2.74224	3.8x10^-3	Up
Dnm1	1.44577	3.8x10^-5	Up
Eif4ebp2	-1.72081	3.8x10^-61	Down
Fn3k	1.00985	3.9x10^-14	Up
Dhrs9	-1.67503	3.9x10^-14	Down
Trib3	2.21444	3.9x10^-16	Up
Gxylt1	-1.13303	3.9x10^-18	Down
C2cd4b	-2.93708	3.9x10^-3	Down
Slc39a5	1.73541	3.9x10^-3	Up
Mst1r	1.34595	3.9x10^-3	Up
H2-DMb2	1.4506	3.9x10^-4	Up
Dgke	1.13871	3.9x10^-6	Up
Epas1	-1.04109	4.0x10^-10	Down
P4ha1	-1.15228	4.0x10^-16	Down
Nusap1	-1.08189	4.0x10^-3	Down
Ptgds	-1.22684	4.0x10^-4	Down
Coro6	3.9055	4.0x10^-4	Up
Mpz	2.25797	4.0x10^-4	Up
Myom3	-1.52626	4.0x10^-4	Down
Gm46382	1.28483	4.0x10^-5	Up
Cyp2j9	1.50925	4.0x10^-6	Up
Tfrc	-1.03332	4.0x10^-9	Down
Cd63	1.76313	4.1x10^-20	Up
Isoc1	-1.23925	4.1x10^-27	Down
Stx1a	1.09765	4.1x10^-3	Up
Cxcl1	-1.76663	4.1x10^-3	Down
Mfsd2a	1.3874	4.1x10^-4	Up
Oip5	-3.68502	4.1x10^-4	Down
Cd79b	1.79907	4.2x10^-10	Up
Ccdc8	-1.45143	4.2x10^-3	Down
Filip1	1.26379	4.2x10^-3	Up
Obsl1	1.00073	4.2x10^-3	Up
Xlr3b	2.00954	4.2x10^-3	Up
Rubcnl	1.2961	4.2x10^-3	Up
Sybu	4.25722	4.2x10^-4	Up
Cpe	1.31845	4.2x10^-4	Up
Sox9	-2.28756	4.2x10^-47	Down
Nup62cl	2.4065	4.2x10^-5	Up
Rtn4rl2	1.41741	4.2x10^-5	Up
Btg2	-1.02715	4.2x10^-6	Down
Igfbp6	1.40348	4.2x10^-8	Up
Tle6	1.44165	4.2x10^-8	Up
Pck2	1.51163	4.3x10^-18	Up
Fbxo40	-1.73165	4.3x10^-3	Down
Il15	1.02476	4.3x10^-3	Up
Wdr93	1.01498	4.3x10^-3	Up
Itgb1bp2	1.07543	4.3x10^-3	Up
Cul4a	-1.01815	4.3x10^-34	Down
Cidec	1.45295	4.3x10^-4	Up
Tox	1.01287	4.3x10^-4	Up
Dcdc2b	1.19398	4.3x10^-5	Up
Hoxb4	1.04118	4.3x10^-5	Up
Lyve1	-1.2666	4.3x10^-6	Down
Grm8	-2.37083	4.3x10^-6	Down
Dnaic1	-1.90729	4.3x10^-7	Down
Scd1	-1.60811	4.3x10^-75	Down
Cyp2a5	2.06182	4.4x10^-10	Up
Tnks	-1.02955	4.4x10^-11	Down
Gm42226	-1.21876	4.4x10^-12	Down
Dnajb9	-2.59366	4.4x10^-29	Down
Crppa	-1.0431	4.4x10^-4	Down
6430550D23Rik	1.25639	4.4x10^-5	Up
Snca	1.11061	4.4x10^-5	Up
Capg	1.178	4.4x10^-7	Up
Prpf38a	-1.21381	4.5x10^-11	Down
Mug1	-1.20159	4.5x10^-22	Down
Uba6	-1.65218	4.5x10^-24	Down
Fbxw11	-1.04508	4.5x10^-29	Down
Gpr137c	1.76938	4.5x10^-3	Up
Tnfrsf4	1.76319	4.5x10^-4	Up
Nr4a1	1.43706	4.5x10^-7	Up
Trim56	-1.2987	4.5x10^-9	Down
Adamts6	2.6453	4.6x10^-12	Up
Fem1c	-1.12391	4.6x10^-12	Down
Rybp	-1.41912	4.6x10^-19	Down
Nr1d2	1.73322	4.6x10^-24	Up
Sdr16c5	-3.15405	4.6x10^-3	Down
Prrg4	1.2742	4.6x10^-3	Up
Osbp2	1.31177	4.6x10^-3	Up
Bhlha15	-3.37817	4.6x10^-30	Down
Dennd4c	-1.48649	4.6x10^-35	Down
Dcaf10	-1.16016	4.6x10^-38	Down
Apob	-1.18878	4.6x10^-38	Down
Fndc5	1.35835	4.6x10^-4	Up
Ccdc189	1.33439	4.6x10^-5	Up
Nadk2	-1.14416	4.6x10^-51	Down
Bmf	1.64818	4.7x10^-18	Up
Mlxipl	1.04446	4.7x10^-22	Up
Atp2a1	4.52597	4.7x10^-3	Up
Akr1b7	3.12733	4.7x10^-4	Up
Cit	1.34213	4.7x10^-4	Up
Fbxo32	1.19012	4.7x10^-5	Up
Hbb-bs	1.0328	4.7x10^-6	Up
Ccdc68	1.45605	4.7x10^-6	Up
Tff3	-2.84705	4.7x10^-8	Down
Zfp169	1.17103	4.8x10^-13	Up
Abcg5	1.26625	4.8x10^-24	Up
H2-Oa	1.75093	4.8x10^-3	Up
Sec24d	-1.15449	4.8x10^-38	Down
Fcmr	1.58719	4.8x10^-4	Up
Cyp2g1	1.76838	4.8x10^-5	Up
Slx1b	1.0394	4.9x10^-17	Up
Lama5	1.30402	4.9x10^-17	Up
Spty2d1	-1.36183	4.9x10^-26	Down
Atp1b2	1.06046	4.9x10^-3	Up
Cep112	2.51193	4.9x10^-3	Up
Ttc30a1	-1.13317	4.9x10^-4	Down
Kcnq4	1.48631	4.9x10^-4	Up
Usp9x	-1.55444	4.9x10^-49	Down
Clec3b	1.76877	4.9x10^-5	Up
Clec2h	1.69603	4.9x10^-5	Up
Ccna2	-1.44707	4.9x10^-6	Down
Dclre1c	1.11243	5.0x10^-10	Up
Gvin2	-2.02513	5.0x10^-11	Down
Als2	-1.14577	5.0x10^-15	Down
Sec23ip	-1.1315	5.0x10^-27	Down
Sgo2a	-1.85186	5.0x10^-3	Down
Septin5	1.01691	5.0x10^-4	Up
Mgp	1.4411	5.0x10^-7	Up
Creld2	-1.56531	5.0x10^-9	Down
Tnnt3	7.28546	5.1x10^-3	Up
1110025M09Rik	1.21032	5.1x10^-3	Up
Fam222a	-1.01864	5.1x10^-6	Down
Hgf	-1.24428	5.1x10^-6	Down
Lrtm1	-1.86442	5.1x10^-7	Down
Renbp	1.25518	5.1x10^-8	Up
Entpd7	-1.57148	5.2x10^-14	Down
Slc6a9	1.22925	5.2x10^-25	Up
Fam50b	1.68965	5.2x10^-3	Up
Gprc5d	3.82395	5.2x10^-3	Up
Plag1	1.44368	5.2x10^-4	Up
Nuf2	-1.68631	5.2x10^-4	Down
Slc14a1	2.87605	5.2x10^-4	Up
Mss51	1.43534	5.2x10^-4	Up
Adgrg2	1.69842	5.2x10^-4	Up
Hspa13	-1.84236	5.2x10^-50	Down
Camsap2	-1.16518	5.3x10^-15	Down
Mob1b	-1.4232	5.3x10^-22	Down
Cnot1	-1.24838	5.3x10^-34	Down
Cyp2b10	-1.02076	5.3x10^-4	Down
Prkar2a	-1.34333	5.3x10^-48	Down
Pbk	-3.95023	5.3x10^-6	Down
Eepd1	1.02389	5.3x10^-9	Up
Arl1	-1.19056	5.4x10^-15	Down
Mob1a	-2.09707	5.4x10^-25	Down
Bend5	2.64735	5.4x10^-3	Up
Cbr3	1.2834	5.4x10^-3	Up
Erbb4	-1.29079	5.4x10^-5	Down
Lgals4	1.46766	5.4x10^-6	Up
Gm13194	1.52009	5.5x10^-13	Up
Enpp4	-1.2468	5.5x10^-17	Down
Pdpk1	-1.10437	5.5x10^-19	Down
Wfikkn1	1.70012	5.5x10^-3	Up
Lmbrd2	-1.6259	5.5x10^-32	Down
Cilp	1.27613	5.5x10^-4	Up
Wdr66	1.23383	5.5x10^-4	Up
Plcd1	1.19459	5.5x10^-4	Up
Hc	-1.05169	5.5x10^-45	Down
Caprin1	-1.26642	5.5x10^-67	Down
Ier3	1.75426	5.5x10^-7	Up
Nolc1	-1.04974	5.6x10^-16	Down
Abhd2	-2.52252	5.6x10^-28	Down
Marchf9	1.00903	5.6x10^-3	Up
Irgq	-1.0627	5.6x10^-33	Down
Prc1	-1.77833	5.6x10^-5	Down
Ormdl1	-1.04899	5.7x10^-19	Down
Hyou1	-1.24743	5.7x10^-20	Down
Kcnn4	1.16481	5.7x10^-3	Up
Cdc20	-2.65851	5.8x10^-12	Down
Lgalsl	-1.51322	5.8x10^-21	Down
Tcap	4.18635	5.8x10^-3	Up
Fndc3a	-1.19822	5.8x10^-38	Down
Fat1	-1.23395	5.8x10^-40	Down
Sbsn	1.16817	5.9x10^-10	Up
Ttn	3.76705	5.9x10^-4	Up
Cenpf	-1.91231	5.9x10^-5	Down
Ccn3	2.36452	5.9x10^-5	Up
Naaladl2	-1.14871	6.0x10^-11	Down
Igsf23	1.35604	6.0x10^-3	Up
Zbtb7c	-1.39306	6.0x10^-3	Down
Ckm	5.00473	6.0x10^-3	Up
Rtn2	1.39216	6.0x10^-3	Up
Ddx3x	-1.1927	6.0x10^-39	Down
Lgi4	2.40732	6.0x10^-4	Up
Gfpt1	-1.89171	6.0x10^-44	Down
Gldn	-4.68065	6.0x10^-6	Down
Emp3	1.0817	6.0x10^-7	Up
Sesn3	-1.87313	6.1x10^-14	Down
Ptch1	-1.04859	6.1x10^-23	Down
Myh10	-1.27358	6.1x10^-28	Down
Mylpf	1.15742	6.1x10^-3	Up
Ankrd52	-1.02411	6.1x10^-31	Down
C9	-1.05493	6.1x10^-32	Down
Slc6a16	1.13981	6.1x10^-4	Up
Pnldc1	1.29154	6.1x10^-5	Up
Lmntd2	1.37695	6.1x10^-8	Up
Tars	-1.05133	6.2x10^-24	Down
Zfp664	-1.36738	6.2x10^-24	Down
Birc5	-1.06041	6.2x10^-3	Down
Asic3	2.33542	6.2x10^-3	Up
Knstrn	-1.1747	6.2x10^-3	Down
Rapgefl1	1.07094	6.2x10^-3	Up
Taco1	-1.3103	6.2x10^-32	Down
Kntc1	-2.06774	6.2x10^-4	Down
Cavin3	1.0324	6.2x10^-4	Up
Gpat3	1.36996	6.2x10^-8	Up
Fam131c	1.09375	6.2x10^-8	Up
Ccr6	3.34208	6.3x10^-3	Up
Chrne	3.67834	6.3x10^-3	Up
Jag2	1.83423	6.3x10^-3	Up
Tmem269	1.4128	6.3x10^-3	Up
Ndufa4l2	1.15824	6.3x10^-4	Up
Cox6b2	1.90576	6.3x10^-4	Up
Slc26a2	-1.09049	6.3x10^-4	Down
Mpp7	-1.23229	6.3x10^-6	Down
Tsr1	-1.10108	6.4x10^-11	Down
Serpina7	2.10004	6.4x10^-13	Up
Tada2b	-1.01168	6.4x10^-19	Down
Cdhr2	1.68829	6.4x10^-3	Up
Scn8a	-1.11404	6.4x10^-3	Down
Ube2g2	-1.10059	6.4x10^-32	Down
Cdk1	-1.10989	6.4x10^-4	Down
Efcc1	1.16347	6.4x10^-4	Up
Cd19	2.22962	6.4x10^-8	Up
Syvn1	-1.52722	6.4x10^-9	Down
Pdpr	-1.88657	6.5x10^-15	Down
Slc2a3	1.38351	6.5x10^-3	Up
Card11	1.29519	6.5x10^-3	Up
Rasl2-9	1.3465	6.5x10^-3	Up
Neurl2	1.0245	6.5x10^-4	Up
Zfp831	2.2415	6.5x10^-4	Up
Mgat2	-1.50596	6.5x10^-54	Down
Ciart	2.82746	6.6x10^-3	Up
Cd2	1.15159	6.6x10^-3	Up
Rgma	1.53764	6.6x10^-4	Up
Clint1	-1.20677	6.6x10^-47	Down
Kif20a	-1.81129	6.6x10^-8	Down
Cyp2a22	1.68067	6.6x10^-8	Up
Nfxl1	-1.00888	6.7x10^-10	Down
Nup62	-1.05188	6.7x10^-16	Down
Cacna1a	1.00993	6.7x10^-4	Up
Large2	1.94428	6.7x10^-5	Up
Slc16a5	1.13423	6.7x10^-6	Up
Mfsd4b5	-1.19426	6.7x10^-8	Down
Acot3	2.49917	6.7x10^-9	Up
Cdkn1a	-1.99018	6.8x10^-11	Down
Hspa5	-1.28938	6.8x10^-18	Down
Mpeg1	-1.38247	6.8x10^-21	Down
Nnat	2.71238	6.8x10^-3	Up
Wasf1	-1.36993	6.8x10^-5	Down
Zfp40	1.23319	6.8x10^-6	Up
Myl9	1.20155	6.8x10^-7	Up
Top2a	-1.37328	6.8x10^-9	Down
Peg3	1.577	6.9x10^-14	Up
Gcc1	-1.13616	6.9x10^-23	Down
Pnpla3	1.14173	6.9x10^-3	Up
Cabp2	1.99573	6.9x10^-3	Up
Gadd45b	1.36717	6.9x10^-5	Up
Castor2	-1.34659	6.9x10^-7	Down
Smim4	1.08338	6.9x10^-8	Up
Btg3	-1.12952	6.9x10^-9	Down
Mtmr6	-1.07553	7.0x10^-15	Down
Trarg1	1.90821	7.0x10^-3	Up
Tmem169	1.86074	7.0x10^-3	Up
Zfr2	1.3421	7.0x10^-3	Up
Gm6614	1.92856	7.0x10^-3	Up
Fam209	2.25231	7.0x10^-3	Up
Gng7	1.51018	7.0x10^-4	Up
Myom1	1.54142	7.0x10^-5	Up
Aurka	-1.87051	7.0x10^-8	Down
D630039A03Rik	1.14964	7.0x10^-9	Up
Cps1	-1.22178	7.1x10^-20	Down
Atp1a3	1.01899	7.1x10^-3	Up
Atp1a2	1.8967	7.1x10^-9	Up
Kif3b	-1.16963	7.2x10^-15	Down
Cadps2	-1.25374	7.2x10^-19	Down
Pdlim3	1.11721	7.2x10^-3	Up
Odf3b	1.12412	7.3x10^-14	Up
Eif4e3	-1.27889	7.3x10^-18	Down
Slc10a5	-1.39421	7.3x10^-24	Down
Kiss1	1.18786	7.3x10^-3	Up
Gstm1	1.82562	7.3x10^-33	Up
Arfgef1	-1.03001	7.3x10^-38	Down
Trhde	-1.7354	7.3x10^-5	Down
Syne4	1.13606	7.3x10^-6	Up
Zfp784	1.02873	7.3x10^-6	Up
Saa2	-3.76848	7.3x10^-7	Down
Ticam1	-1.00434	7.4x10^-18	Down
Ms4a1	1.30605	7.4x10^-3	Up
Acta1	7.49077	7.4x10^-3	Up
Mgst3	1.69436	7.4x10^-31	Up
Cyp2a4	2.94752	7.5x10^-10	Up
Orm3	-2.93059	7.5x10^-13	Down
Mical2	-1.14418	7.5x10^-14	Down
Mtrex	-1.08531	7.5x10^-29	Down
Mutyh	1.59977	7.5x10^-3	Up
Tvp23a	1.67803	7.5x10^-3	Up
Cdv3-ps	-1.72132	7.5x10^-3	Down
Cyp4a14	3.12331	7.5x10^-5	Up
Hddc2	1.34312	7.5x10^-5	Up
Crebrf	1.00193	7.6x10^-11	Up
Hspa1a	-2.57925	7.6x10^-14	Down
Cflar	-1.04781	7.6x10^-25	Down
Synpo2	1.19638	7.6x10^-4	Up
Washc4	-1.02739	7.7x10^-15	Down
Fxyd6	1.08261	7.7x10^-3	Up
Fndc3b	-1.50524	7.7x10^-30	Down
Gal3st1	1.53343	7.7x10^-6	Up
Cda	1.2036	7.7x10^-9	Up
Gstm4	1.10722	7.8x10^-16	Up
Slc3a1	-1.19514	7.8x10^-24	Down
1700109H08Rik	1.23724	7.8x10^-3	Up
Arntl	-1.35414	7.8x10^-4	Down
Plxna2	-1.27932	7.8x10^-4	Down
Mcm5	-1.28308	7.8x10^-7	Down
Klhdc8b	1.02211	7.9x10^-10	Up
Nab2	1.11423	7.9x10^-10	Up
Aqp4	1.26692	7.9x10^-11	Up
Fktn	-1.0412	7.9x10^-16	Down
Mrnip	1.50395	7.9x10^-18	Up
Pgam2	4.1468	7.9x10^-3	Up
Krt222	3.96521	7.9x10^-3	Up
LOC108167553	1.1588	7.9x10^-4	Up
LOC102634078	1.26447	7.9x10^-5	Up
Bex4	3.48389	8.0x10^-4	Up
Pja2	-1.63819	8.0x10^-41	Down
Smim1	1.31109	8.1x10^-16	Up
Dnajb1	-1.19155	8.1x10^-18	Down
Gm52051	-3.58318	8.1x10^-3	Down
Neil2	1.45694	8.1x10^-3	Up
Bspry	2.13256	8.1x10^-3	Up
Gm50598	-3.87854	8.1x10^-4	Down
Wsb1	1.10682	8.1x10^-4	Up
Foxj1	-1.34516	8.2x10^-3	Down
Kcnip3	1.26345	8.2x10^-3	Up
Ect2	-1.54924	8.2x10^-4	Down
Gpsm1	1.17196	8.2x10^-5	Up
Tef	1.49594	8.2x10^-6	Up
Acot2	1.56578	8.2x10^-9	Up
Txlna	-1.03457	8.3x10^-21	Down
Maff	2.1308	8.3x10^-26	Up
Dlgap5	-1.42873	8.3x10^-3	Down
Nkain4	1.66323	8.3x10^-3	Up
Capn8	-1.51095	8.3x10^-9	Down
Hccs	-1.12648	8.4x10^-16	Down
Ttc26	-1.23015	8.4x10^-3	Down
Slc4a8	1.21931	8.4x10^-3	Up
Cnmd	1.08377	8.4x10^-5	Up
Gnal	1.67234	8.4x10^-5	Up
Pf4	1.20559	8.5x10^-3	Up
Usp1	-1.05985	8.6x10^-22	Down
Spata7	1.04803	8.6x10^-4	Up
Tnnt2	2.0538	8.6x10^-6	Up
Amigo3	-1.71824	8.6x10^-8	Down
Chac1	1.78244	8.7x10^-3	Up
Fcrla	1.50886	8.7x10^-3	Up
Moxd1	-6.68715	8.7x10^-37	Down
Pax5	1.36834	8.7x10^-4	Up
Atp11a	-1.70201	8.8x10^-10	Down
Phgdh	1.74599	8.8x10^-4	Up
Acsbg1	2.15667	8.9x10^-3	Up
Ifit1bl1	-1.62091	8.9x10^-3	Down
Lysmd3	-1.92342	8.9x10^-40	Down
Esco2	-2.07557	8.9x10^-6	Down
Wipf3	1.03308	8.9x10^-8	Up
Gstt2	1.23365	9.0x10^-22	Up
Tnip3	2.38752	9.0x10^-3	Up
Zfp575	3.49794	9.0x10^-3	Up
Slpi	1.24084	9.0x10^-3	Up
Rab37	1.62102	9.0x10^-3	Up
Nyap1	1.21081	9.0x10^-3	Up
Cyp4a10	1.81498	9.0x10^-4	Up
Obp2a	-1.72016	9.0x10^-4	Down
Setx	-1.18372	9.1x10^-26	Down
Caskin1	2.34883	9.1x10^-3	Up
Prr22	2.45446	9.1x10^-4	Up
Fbf1	1.23477	9.2x10^-15	Up
D17H6S56E-5	-1.28058	9.2x10^-7	Down
D830031N03Rik	-1.9049	9.2x10^-9	Down
Gm11992	1.55459	9.3x10^-4	Up
Uap1	-1.27727	9.3x10^-45	Down
Septin1	1.16515	9.3x10^-6	Up
Meig1	2.88112	9.3x10^-6	Up
Xcr1	1.17707	9.4x10^-3	Up
Gnat1	1.23172	9.4x10^-6	Up
Gm33153	2.01373	9.4x10^-7	Up
Crybg2	1.22464	9.4x10^-7	Up
Mgat5	-2.37345	9.5x10^-29	Down
Slc4a1	1.4141	9.5x10^-3	Up
Pbx4	1.82485	9.5x10^-5	Up
Btla	1.71515	9.5x10^-6	Up
Fgf21	6.19293	9.6x10^-13	Up
Zdhhc23	1.08354	9.6x10^-3	Up
Mybl2	1.15899	9.7x10^-3	Up
Zfp558	-1.05461	9.7x10^-3	Down
Spred3	1.55911	9.7x10^-5	Up
Id1	1.5701	9.8x10^-13	Up
Pcp4l1	1.69658	9.8x10^-17	Up
Hook1	-1.06985	9.8x10^-26	Down
Hand2	1.05773	9.9x10^-11	Up
Ftl1-ps2	3.09687	9.9x10^-3	Up
4930579G24Rik	-1.32798	9.9x10^-3	Down
Stap1	1.29765	9.9x10^-3	Up
Mettl24	3.17844	9.9x10^-3	Up
FC, fold change.

## Sheet: Table S2
Table SII. GO enrichment analysis highlights key functional categories in transcriptomics.
ID	Term	Category	P-value	Enrichment score	Genes
GO:0016491	Oxidoreductase activity	Molecular_function	1.1x10^-5	1.43742	Acad11;Acadl;Adh1;Adh4;Agmo;Akr1b7;Akr1c18;Aldh18a1;Aldh1b1;Aldh1l2;Aldh3b1;Aldh4a1;Aldh6a1;Alkbh5;Aoc3;Aox1;Aox3;Aspdh;Asph;Blvrb;Cbr1;Cbr3;Chchd4;Cox6a1;Cox7a1;Cpox;Cyb561;Cyb5r1;Cyb5r4;Cyp17a1;Cyp1a1;Cyp1a2;Cyp26a1;Cyp2b10;Cyp2b9;Cyp2c23;Cyp2c37;Cyp2c38;Cyp2c54;Cyp2c55;Cyp2c70;Cyp2d10;Cyp2d9;Cyp2u1;Cyp39a1;Cyp3a25;Cyp46a1;Cyp4a10;Cyp4a14;Cyp51;Dct;Dcxr;Decr2;Dhcr24;Dhrs9;Dmgdh;Ero1a;Ero1b;F8;F…
GO:0000166	Nucleotide binding	Molecular_function	9.3x10^-6	1.24741	Aak1;Abca1;Abca2;Abca5;Abca6;Abca8a;Abcb1a;Abcb7;Abcc10;Abcc12;Abcc4;Abcd2;Abcd4;Abcg5;Acacb;Acly;Acsbg1;Acsl4;Acta1;Acta2;Actg2;Acvr2a;Adcy7;Aldh18a1;Arf2;Arf6;Arl1;Arl5a;Ascc3;Asns;Atad1;Atad2;Atm;Atp11a;Atp13a3;Atp1a2;Atp1a3;Atp2a1;Atp2a2;Atp2a3;Atp2b1;Atp2b2;Atp2c1;Atp4a;Atp6v1a;Atp7a;Atp8b1;Atp8b5;Aurka;Baz1b;Blk;Bmpr1a;Bmpr2;Cad;Camk1d;Cdk1;Cdk13;Cdkl2;Cdkl5;Chd9;Chek1;Chkb;Cit;Ckm;Clcn3;Cl…
GO:0020037	Heme binding	Molecular_function	9.2x10^-6	1.92094	Cyb5a;Cyb5b;Cyb5r4;Cygb;Cyp17a1;Cyp1a1;Cyp1a2;Cyp26a1;Cyp2a22;Cyp2a4;Cyp2a5;Cyp2b10;Cyp2b9;Cyp2c23;Cyp2c37;Cyp2c38;Cyp2c54;Cyp2c55;Cyp2c67;Cyp2c68;Cyp2c69;Cyp2c70;Cyp2d10;Cyp2d34;Cyp2d9;Cyp2g1;Cyp2j8;Cyp2j9;Cyp2u1;Cyp39a1;Cyp3a25;Cyp46a1;Cyp4a10;Cyp4a14;Cyp51;Hba-a1;Hba-a2;Hbb-bt;Hccs;Nr1d1;Ptgis;Rsad1;Src;Steap4
GO:0016740	Transferase activity	Molecular_function	3.8x10^-6	1.25459	Aadat;Aak1;Abat;Acat2;Acly;Acvr2a;Aldh18a1;Alg10b;Alg2;Alg6;Ankib1;Antkmt;Arel1;Arih1;Armt1;Art4;Ash1l;Aspg;Ate1;Atm;Aurka;B3galt6;B4galt5;Baz1b;Bcat2;Blk;Bmpr1a;Bmpr2;Brca1;Bud23;C1galt1;Cad;Camk1d;Carnmt1;Cblc;Cbll1;Cdk1;Cdk13;Cdkl2;Cdkl5;Cdyl;Cers5;Chek1;Chkb;Chst2;Cit;Ckm;Clk2;Clock;Colgalt1;Comtd1;Cpt1b;Cpt1c;Crat;Crppa;Csgalnact2;Dbt;Dclk2;Dgka;Dgke;Dgkh;Dgkq;Dmpk;Dpagt1;Dpy19l3;Dstyk;Dtx3;…
GO:0042802	Identical protein binding	Molecular_function	1.3x10^-6	1.26192	A2m;Abat;Acacb;Acadl;Accs;Ace2;Acpp;Actn2;Acy1;Adamtsl4;Adh1;Aim2;Aldh18a1;Aldh4a1;Aldoa;Als2;Als2cl;Amd1;Angptl4;Angptl7;Aoc3;Aox1;Aplp1;Apoa4;Appl1;Aqp4;Arhgap4;Arid3a;Arrdc1;Asns;Atf1;Atf2;Atf3;Atf6;Atm;Banf1;Banp;Bax;Bex3;Bhlha15;Birc5;Blmh;Bmp4;Bnip3;Brca2;C1qtnf2;C1qtnf7;Cacnb2;Cad;Capn8;Caskin1;Casp8;Casp8ap2;Castor2;Cbll1;Ccdc91;Cd2;Cd247;Cd300lf;Cd4;Cd79a;Cd79b;Cda;Cdh1;Cdh2;Cdyl;Cebpb;C…
GO:0019899	Enzyme binding	Molecular_function	9.3x10^-7	1.58862	A2m;Ar;Armt1;Atp2a2;Atpif1;Banf1;Birc5;Blnk;Blzf1;Brca1;Cabyr;Cacna1c;Cad;Calu;Ccnd1;Ccs;Cd4;Cdc20;Cdh2;Crk;Ctnnb1;Cyb5a;Cyp1a1;Cyp1a2;Cyp2a4;Cyp2a5;Ddc;Dhcr24;Dtx3l;Ecm1;Eif2ak3;Ephx1;Esr1;Fdx1;Fn1;Gckr;Gldc;Gstm2;Gstm4;H2ax;Hacd2;Hif1a;Hk3;Hlcs;Hspa1a;Hspa5;Il6ra;Iqcb1;Luc7l2;Mapk14;Mapt;Marchf6;Mlec;Mst1r;Nlrp1b;Notch2;Park7;Parp1;Parp14;Phf6;Pkp3;Plcb1;Plce1;Por;Pparg;Ppp1r3b;Ppp1r3c;Ppp3r1;P…
GO:0016712	Oxidoreductase activity, acting on paired donors, with incorporation or reduction of molecular oxygen, reduced flavin or flavoprotein as one donor, and incorporation of one atom of oxygen	Molecular_function	4.9x10^-7	2.86763	Cyp1a1;Cyp1a2;Cyp2a22;Cyp2a4;Cyp2a5;Cyp2b10;Cyp2b9;Cyp2c23;Cyp2c37;Cyp2c38;Cyp2c54;Cyp2c55;Cyp2c67;Cyp2c68;Cyp2c69;Cyp2c70;Cyp2d10;Cyp2d34;Cyp2d9;Cyp2g1;Cyp2j8;Cyp2j9;Cyp2u1;Cyp3a25
GO:0008392	Arachidonic acid epoxygenase activity	Molecular_function	1.9x10^-7	3.60562	Cyp2a22;Cyp2a4;Cyp2a5;Cyp2b10;Cyp2b9;Cyp2c23;Cyp2c37;Cyp2c38;Cyp2c54;Cyp2c55;Cyp2c67;Cyp2c68;Cyp2c69;Cyp2c70;Cyp2g1;Cyp4a10;Cyp4a31;Cyp4a32
GO:0008395	Steroid hydroxylase activity	Molecular_function	1.8x10^-7	2.85607	Cyp1a1;Cyp2a22;Cyp2a4;Cyp2a5;Cyp2b10;Cyp2b9;Cyp2c23;Cyp2c37;Cyp2c38;Cyp2c54;Cyp2c55;Cyp2c67;Cyp2c68;Cyp2c69;Cyp2c70;Cyp2d10;Cyp2d34;Cyp2d9;Cyp2g1;Cyp2j8;Cyp2j9;Cyp2u1;Cyp39a1;Cyp3a25;Cyp3a59;Cyp46a1
GO:0046872	Metal ion binding	Molecular_function	1.2x10^-7	1.20865	Abat;Abcg5;Abcg8;Ablim2;Acacb;Acap1;Ace2;Acly;Acmsd;Actn2;Acvr2a;Acy1;Adal;Adam10;Adam33;Adam9;Adamts10;Adamts2;Adamts4;Adat1;Adat2;Adcy7;Adh1;Adh4;Agbl2;Agfg1;Ago2;Akap8l;Alkbh5;Ankib1;Ankzf1;Aoc3;Aox1;Aox3;Aplp1;Ar;Arap2;Arfgap3;Arhgap45;Arhgef2;Arih1;Arl1;Armc1;Armt1;Arsb;Asah2;Ash1l;Asph;Atf2;Atox1;Atp11a;Atp13a3;Atp1a2;Atp1a3;Atp2a1;Atp2a2;Atp2a3;Atp2b1;Atp2b2;Atp2c1;Atp4a;Atp7a;Atp8b1;Atp8b…
GO:0005747	Mitochondrial respiratory chain complex I	Cellular_component	3.0x10^-5	2.72425	Ndufa1;Ndufa12;Ndufa13;Ndufa2;Ndufa3;Ndufa5;Ndufa6;Ndufa8;Ndufb1;Ndufb2;Ndufb4;Ndufb7;Ndufc1;Ndufs5;Ndufs7;Ndufs8;Ndufv3;Wdr93
GO:0034364	High-density lipoprotein particle	Cellular_component	2.7x10^-5	3.55337	Apoa2;Apoa4;Apob;Apoc1;Apoc4;Hdlbp;Pla2g7;Pltp;Pon1;Saa1;Saa2;Saa4
GO:0005794	Golgi apparatus	Cellular_component	1.2x10^-5	1.27858	Abca1;Abca5;Abca6;Acbd3;Acsbg1;Adam10;Aftph;Alkbh5;Angptl3;Aoc3;Ap1ar;Ap1g1;Aplp1;Arcn1;Arf2;Arf6;Arfgap3;Arfgef1;Arfgef2;Arhgap4;Arhgef2;Arl1;Arsb;Arv1;Asah2;Ash1l;Atf6;Atp1a3;Atp2c1;Atp7a;Atp8b1;Atxn2;Azin2;B3galt6;B4galt5;Bend5;Bet1l;Blzf1;Cabp2;Calu;Camsap2;Cand1;Capn8;Ccdc186;Ccdc91;Cd247;Cd46;Cdh1;Cdk13;Chac1;Chst2;Clcn3;Clic5;Clint1;Cog3;Cog6;Colec10;Cpe;Creld2;Crhr2;Csgalnact2;Cspg5;Cttn;…
GO:0005739	Mitochondrion	Cellular_component	5.0x10^-6	1.25181	1810058I24Rik;Aadat;Abat;Abcb7;Abcc12;Abcd2;Abhd6;Acacb;Acad11;Acad12;Acadl;Acat2;Acbd3;Acly;Acot13;Acot2;Acsl4;Adh1;Ago2;Aim2;Akr1b7;Aldh18a1;Aldh1b1;Aldh1l2;Aldh4a1;Aldh6a1;Aldoa;Ammecr1;Ankrd37;Antkmt;Armc1;Armcx3;Armcx6;Arsb;Asah2;Atad1;Atf2;Atp5e;Atp5g1;Atp5h;Atp5j;Atp5j2;Atp6v1a;Atpaf1;Atpif1;Aurkaip1;Azin2;Bax;Bbc3;Bcat2;Bcl2l11;Bloc1s1;Bnip3;Bola1;Caprin2;Card19;Casp8;Casp8ap2;Cdk1;Cebpzo…
GO:0005634	Nucleus	Cellular_component	2.4x10^-6	1.11988	1810024B03Rik;2210016L21Rik;4932438A13Rik;Abraxas2;Acacb;Acad11;Acot13;Actr6;Adam10;Adrb3;Aebp1;Aff1;Aff4;Agfg1;Ago1;Ago2;Ago4;Ahctf1;Ahnak2;Aim2;Akap17b;Akap8l;Akirin1;Akr1c18;Alg2;Alkbh5;Als2;Amer1;Amigo2;Ammecr1;Anapc1;Anapc13;Ankrd16;Ankrd17;Ankrd23;Ankrd28;Ankrd37;Anln;Anxa9;Apbb1;Apbb3;Appbp2;Appl1;Ar;Arfgef1;Arhgap11a;Arid3a;Arid4a;Arid5b;Arih1;Armcx3;Arntl;Arntl2;Arvcf;Ascc3;Ash1l;Aspm;At…
GO:0005654	Nucleoplasm	Cellular_component	2.0x10^-6	1.18831	Abca6;Abcb1a;Acly;Adh1;Adh4;Aff4;Aftph;Aim2;Akirin1;Aldh1b1;Aldh1l2;Aldh6a1;Alkbh5;Ammecr1;Ankrd17;Ankrd23;Ankrd37;Anln;Aplp1;Appbp2;Arfgef1;Arid3a;Arid4a;Arntl;Arntl2;Ash1l;Atad2;Atad2b;Atf1;Atf2;Atf3;Atm;Atp2b1;Atp6v1a;Atp8b1;Aurka;Aurkaip1;Banf1;Banp;Bbx;BC005624;Bdp1;Bex4;Blvrb;Blzf1;Bmpr2;Bnip3;Bptf;Brca1;Brca2;Btbd10;Bud23;Cabyr;Cad;Cadps2;Cand1;Capg;Caprin2;Casp8;Cbfb;Cbr3;Ccdc62;Ccdc8;Ccd…
GO:0005829	Cytosol	Cellular_component	1.3x10^-7	1.19124	Acat2;Acly;Acmsd;Acot3;Adgrg2;Adh1;Adh4;Aftph;Agbl2;Ago1;Ago2;Ago4;Ahcyl2;Ahnak2;Aim2;Akap12;Akr1b7;Akr1c18;Aldh1b1;Aldh3b1;Aldh4a1;Aldoa;Alg2;Alkbh5;Als2;Amd1;Ankrd23;Ankrd37;Anxa9;Aox1;Ap1g1;Apbb3;Apoa2;Apoa4;Apob;Apoc3;Appl1;Ar;Arcn1;Arel1;Arf6;Arfgap3;Arfgef1;Arfgef2;Arfip1;Arhgap5;Arid3a;Arid4a;Armc1;Armcx3;Arntl;Ascc3;Asns;Atox1;Atp6v1a;Atp7a;Atp8b1;Atxn2;Aurka;Azin2;Bag3;Bag4;Banf1;Bax;Bbx…
GO:0043231	Intracellular membrane-bounded organelle	Cellular_component	6.8x10^-8	1.3964	Abca1;Abca14;Abca2;Abca5;Abca6;Abca8a;Acsbg1;Acsl4;Adam10;Adamtsl3;Aftph;Agfg1;Ahcyl2;Aldh1b1;Als2;Amer1;Aoc3;Ap1g1;Ap2s1;Apob;Arfgef2;Arntl;Atm;Atp11a;Atp2a1;Atp2b1;Atp2b2;Atp2c1;Atp6v1a;Aurkaip1;Bcl2l11;Blvrb;Cadps2;Calcoco1;Calu;Cbr1;Ccn3;Ccnl2;Cd63;Cemip2;Cep131;Ces2b;Ces2c;Chek1;Cisd3;Clcn3;Clint1;Cln6;Clock;Cmtm6;Cnnm1;Cpd;Cpt1b;Cstf2t;Cttn;Cyb5a;Cyb5b;Cyp17a1;Cyp1a1;Cyp1a2;Cyp26a1;Cyp2a22;…
GO:0005783	Endoplasmic reticulum	Cellular_component	2.1x10^-12	1.42939	Abcc12;Abcd4;Acsbg1;Acsl4;Adora1;Agmo;Ahcyl2;Alg10b;Alg6;Ankle2;Aoc3;Apbb1;Aph1b;Aph1c;Apob;Arcn1;Arhgap5;Arv1;Asph;Atf6;Atf6b;Atp11a;Atp1a3;Atp2a1;Atp2a2;Atp2a3;Atp2b2;Atp2c1;Atp7a;Atp8b1;Bax;Bcap31;Bnip3;C2cd2l;Calcrl;Calu;Canx;Card19;Ccdc134;Cercam;Cers5;Ces1b;Ces2c;Chrm3;Cib1;Cidec;Cln6;Col1a2;Colgalt1;Cpt1c;Crat;Creb3l2;Creld2;Crhr2;Crtap;Cspg5;Cyb5a;Cyb5r4;Cyp17a1;Cyp1a1;Cyp1a2;Cyp26a1;Cyp2…
GO:0005737	Cytoplasm	Cellular_component	7.4x10^-15	1.18157	1810024B03Rik;4930579G24Rik;Aak1;Abhd13;Ablim2;Abraxas2;Acat2;Ace2;Acly;Acmsd;Acot13;Acsbg1;Acsl4;Acta1;Acta2;Actg2;Actn2;Actr6;Acvr2a;Acy1;Adam10;Adam9;Adh1;Adh4;Aebp1;Aftph;Agbl2;Aggf1;Ago1;Ago2;Ago4;Ahctf1;Ahcyl2;Ahnak2;Aim2;Akap12;Akap5;Akap8l;Akr1b7;Akr1c18;Aldh18a1;Aldh1l2;Aldh3b1;Aldoa;Alg2;Als2;Als2cl;Amer1;Ankib1;Ankrd16;Ankrd17;Ankrd26;Ankrd37;Ankzf1;Anln;Anxa9;Aoc3;Aox1;Aox3;Ap1g1;Apbb…
GO:0006986	Response to unfolded protein	Biological_process	3.0x10^-5	2.57005	Atf6;Atf6b;Chac1;Creb3l2;Crebrf;Dnajb9;Dnajc3;Edem1;Edem3;Eif2ak3;Ficd;Herpud1;Herpud2;Hsp90aa1;Hspa4l;Hsph1;Manf;Mfn2;Syvn1;Upf2
GO:0030968	Endoplasmic reticulum unfolded protein response	Biological_process	2.2x10^-5	2.61947	Atf3;Atf6;Atf6b;Bhlha15;Canx;Ccnd1;Creb3l2;Dnajc3;Eif2ak3;Ermp1;Ero1a;Herpud1;Herpud2;Hspa5;Ppp1r15a;Rnf121;Selenos;Stub1;Tbl2;Wfs1
GO:0006511	Ubiquitin-dependent protein catabolic process	Biological_process	1.2x10^-5	1.70265	Ankib1;Arel1;Arih1;Cacul1;Cblc;Cul4a;Cul4b;Cyld;Ddb1;Dtx3l;Fbxl2;Fbxo10;Fbxo2;Fbxo45;Fem1a;Fem1c;Herpud1;Kctd6;Klhl15;Mib1;Mylip;Ndfip2;Nploc4;Psma4;Rc3h1;Rnf125;Rnf144b;Rnf149;Rnf167;Rnf168;Rnf185;Rnf217;Rnf6;Skp2;Spsb2;Stub1;Syvn1;Trim25;Trim32;Trip12;Trp53inp2;Uba6;Ube2c;Ube2g2;Ube3a;Ube3c;Ubqln1;Ubqln2;Ubr1;Ubr3;Uhrf1;Usp1;Usp12;Usp16;Usp18;Usp25;Usp34;Usp36;Usp38;Usp46;Usp9x;Wwp1
GO:0006869	Lipid transport	Biological_process	1.0x10^-5	2.06036	Abca1;Abca14;Abca2;Abca5;Abca6;Abca8a;Abcg5;Abcg8;Apoa2;Apoa4;Apob;Apoc1;Apoc3;Apoc4;Arv1;Atp11a;Atp8b1;Atp8b5;C2cd2l;Esyt1;Hdlbp;Mfsd2a;Mfsd2b;Mttp;Nme4;Osbp;Osbp2;Osbpl8;Pdzd8;Pltp;Slc27a1;Star;Stoml1;Tmem30b;Triap1;Vldlr
GO:0019373	Epoxygenase P450 pathway	Biological_process	8.8x10^-6	3.29546	Cyp2a22;Cyp2a4;Cyp2a5;Cyp2b10;Cyp2b9;Cyp2c23;Cyp2c37;Cyp2c38;Cyp2c54;Cyp2c55;Cyp2c67;Cyp2c68;Cyp2c69;Cyp2c70;Cyp2g1
GO:0006082	Organic acid metabolic process	Biological_process	2.6x10^-6	2.86046	Cyp2a22;Cyp2a4;Cyp2a5;Cyp2b10;Cyp2b9;Cyp2c23;Cyp2c37;Cyp2c38;Cyp2c54;Cyp2c55;Cyp2c67;Cyp2c68;Cyp2c69;Cyp2c70;Cyp2d10;Cyp2d34;Cyp2d9;Cyp2g1;Cyp2j8;Cyp2j9;Cyp2u1
GO:0006805	Xenobiotic metabolic process	Biological_process	2.1x10^-6	2.519	Cyp26a1;Cyp2a22;Cyp2a4;Cyp2a5;Cyp2b10;Cyp2b9;Cyp2c23;Cyp2c37;Cyp2c38;Cyp2c54;Cyp2c55;Cyp2c67;Cyp2c68;Cyp2c69;Cyp2c70;Cyp2d10;Cyp2d34;Cyp2d9;Cyp2g1;Cyp2j8;Cyp2j9;Cyp2u1;Cyp46a1;Gsta2;Gsta4;Rorc;Sult1a1
GO:0042738	Exogenous drug catabolic process	Biological_process	1.8x10^-7	3.07146	Cyp1a2;Cyp2a22;Cyp2a4;Cyp2a5;Cyp2b10;Cyp2b9;Cyp2c23;Cyp2c37;Cyp2c38;Cyp2c54;Cyp2c55;Cyp2c67;Cyp2c68;Cyp2c69;Cyp2c70;Cyp2d10;Cyp2d34;Cyp2d9;Cyp2g1;Cyp2j8;Cyp2j9;Cyp2u1;Nudt15
GO:0007049	Cell cycle	Biological_process	1.8x10^-7	1.51468	Abraxas2;Ahctf1;Anapc1;Anapc13;Anapc15;Ankle2;Anln;Appl1;Arf6;Arhgef2;Arpp19;Aspm;Atm;Aurka;Avpi1;Banp;Birc5;Brca1;Brca2;Cacul1;Casp8ap2;Ccna2;Ccnb1;Ccnd1;Ccnf;Ccng1;Ccnt1;Ccny;Cdc20;Cdc26;Cdc45;Cdc73;Cdca2;Cdk1;Cdkn1a;Cdkn1c;Cdkn3;Cenpv;Cenpx;Cep131;Chek1;Cib1;Cit;Ckap2;Cks1b;Cltc;Cul4b;Ddias;Dlgap5;Dync1li1;E2f2;E2f3;Ect2;Esco2;Fbxw11;Foxm1;Gadd45a;Gadd45gip1;Gnai1;Gnai3;H2ax;Hcfc1;Inca1;Kat2b;…
GO:0006629	Lipid metabolic process	Biological_process	1.6x10^-7	1.55636	4932438A13Rik;Abhd2;Abhd6;Acacb;Acad11;Acadl;Acap1;Acbd3;Acly;Acot2;Acot3;Acsbg1;Acsl4;Adtrp;Angptl3;Angptl4;Apob;Apoc3;Arv1;Asah2;Aspg;B4galt5;Brca1;Cers5;Chkb;Cpt1b;Cpt1c;Crat;Crk;Crkl;Cyb5r1;Cyp1a1;Cyp1a2;Cyp2c23;Cyp2c37;Cyp2c38;Cyp39a1;Cyp46a1;Cyp4a10;Cyp51;Decr2;Dgka;Dhcr24;Dhrs9;Dpep1;Ech1;Echdc2;Eci1;Enpp2;Etnk1;Fads3;Fdft1;Fdx1;Fitm1;Fitm2;Gal3st1;Gpat2;Gpat3;Gstm4;Hacd2;Hdlbp;Hint2;Hmgcs…
GO, Gene Ontology.

## Sheet: Table S3
Table SIII. Kyoto Encyclopedia of Genes and Genomes database-based pathway enrichment analysis of differentially expressed genes.
ID	Term	Classification	P-value	Enrichment Score	Genes
Mmu03320	PPAR signaling pathway	Organismal systems	8.4x10^-6	3.5442	Acsbg1;Acsl4;Angptl4;Cpt1b;Cpt1c;Cyp4a10;Cyp4a14;Cyp4a31;Cyp4a32;Fabp1;Pck2;Pdpk1;Plin1;Ppard;Scd1;Scd3
Mmu01524	Platinum drug resistance	Human diseases	9.4x10^-6	3.69649	Birc5;Brca1;Cdkn1a;Gm3776;Gsta2;Gstm1;Gstm2;Gstm3;Gstm4;Gstp3;Gstt2;Mgst3;Pdpk1;Pik3r3;Top2a
Mmu00590	Arachidonic acid metabolism	Metabolism	2.0x10^-5	3.47905	Cbr1;Cbr3;Cyp2b10;Cyp2b9;Cyp2c38;Cyp2j8;Cyp2j9;Cyp4a10;Cyp4a14;Cyp4a31;Cyp4a32;Ltc4s;Pla2g12a;Ptgds;Ptges
Mmu04260	Cardiac muscle contraction	Organismal systems	6.4x10^-5	3.32536	Atp1a2;Atp1a3;Atp1b2;Atp2a1;Atp2a2;Cacna1c;Cacnb2;Cacng7;Cox6b2;Cox7a1;Cox8b;Fxyd2;Tnnt2;Tpm2
Mmu00980	Metabolism of xenobiotics by cytochrome P450	Metabolism	2.7x10^-4	3.24076	Aldh3b1;Cbr1;Cbr3;Gm3776;Gsta2;Gstm1;Gstm2;Gstm3;Gstm4;Gstp3;Gstt2;Mgst3
Mmu04110	Cell cycle	Cellular processes	4.6x10^-4	2.5645	Ccna2;Ccnb1;Ccnd1;Cdc20;Cdk1;Cdkn1a;Cdkn1c;Chek1;E2f2;Espl1;Gadd45a;Gadd45b;Mcm4;Mcm5;Rbl1;Ttk
Mmu05225	Hepatocellular carcinoma	Human diseases	4.6x10^-4	2.27915	Ccnd1;Cdkn1a;E2f2;Fzd6;Gadd45a;Gadd45b;Gm3776;Gsta2;Gstm1;Gstm2;Gstm3;Gstm4;Gstp3;Gstt2;Hgf;Mgst3;Nqo1;Pik3r3;Smarcd3;Wnt4
Mmu05204	Chemical carcinogenesis	Human diseases	5.4x10^-4	2.73272	Aldh3b1;Cbr1;Cyp2b10;Cyp2b9;Cyp2c38;Gm3776;Gsta2;Gstm1;Gstm2;Gstm3;Gstm4;Gstp3;Gstt2;Mgst3
Mmu04919	Thyroid hormone signaling pathway	Organismal systems	1.0x10^-3	2.46433	Atp1a2;Atp1a3;Atp1b2;Atp2a1;Atp2a2;Ccnd1;Esr1;Fxyd2;Pdpk1;Pik3r3;Plcb1;Plcd1;Plcd3;Pln;Wnt4
Mmu04141	Protein processing in endoplasmic reticulum	Genetic information processing	1.1x10^-3	2.17778	Dnajb1;Edem1;Edem3;Eif2ak3;Ero1a;Fbxo2;Herpud1;Hspa1a;Hspa1b;Hspa5;Hsph1;Hyou1;Sec23b;Sec24c;Sec24d;Sel1l;Syvn1;Ube2g2;Ubqln2
Mmu00983	Drug metabolism - other enzymes	Metabolism	2.2x10^-3	2.57147	Cda;Ces2b;Gm3776;Gsta2;Gstm1;Gstm2;Gstm3;Gstm4;Gstp3;Gstt2;Mgst3;Upp2
Mmu00480	Glutathione metabolism	Metabolism	2.9x10^-3	2.77671	Chac1;Gm3776;Gsta2;Gstm1;Gstm2;Gstm3;Gstm4;Gstp3;Gstt2;Mgst3
Mmu00982	Drug metabolism - cytochrome P450	Metabolism	2.9x10^-3	2.77671	Aldh3b1;Gm3776;Gsta2;Gstm1;Gstm2;Gstm3;Gstm4;Gstp3;Gstt2;Mgst3
Mmu04710	Circadian rhythm	Organismal systems	3.4x10^-3	3.94292	Arntl;Cry1;Fbxw11;Npas2;Nr1d1;Per3
Mmu00830	Retinol metabolism	Metabolism	3.5x10^-3	2.43892	Cyp26a1;Cyp2a4;Cyp2a5;Cyp2b10;Cyp2b9;Cyp2c38;Cyp4a10;Cyp4a14;Cyp4a31;Cyp4a32;Dhrs9;Sdr16c5
Mmu04964	Proximal tubule bicarbonate reclamation	Organismal systems	4.2x10^-3	4.48059	Atp1a2;Atp1a3;Atp1b2;Fxyd2;Pck2
Mmu00071	Fatty acid degradation	Metabolism	4.3x10^-3	3.03302	Acsbg1;Acsl4;Cpt1b;Cpt1c;Cyp4a10;Cyp4a14;Cyp4a31;Cyp4a32
Mmu04261	Adrenergic signaling in cardiomyocytes	Organismal systems	4.3x10^-3	2.07522	Atp1a2;Atp1a3;Atp1b2;Atp2a1;Atp2a2;Atp2b2;Cacna1c;Cacnb2;Cacng7;Creb3l2;Fxyd2;Gnai1;Plcb1;Pln;Tnnt2;Tpm2
Mmu04975	Fat digestion and absorption	Organismal systems	4.7x10^-3	3.28577	Abcg5;Abcg8;Apoa4;Apob;Fabp1;Mogat2;Pla2g12a
Mmu04925	Aldosterone synthesis and secretion	Organismal systems	5.3x10^-3	2.31937	Atp1a2;Atp1a3;Atp1b2;Atp2b2;Cacna1c;Creb3l2;Itpr1;Kcnk3;Nr4a1;Plcb1;Pomc;Star
PPAR, peroxisome proliferator-activated receptor.

## Sheet: Table S4
Table SIV. TF families and corresponding target genes.
Family	TF ID	TF up/down	Target	Target up/down	Function
zf-C2H2	Gli1	Up	Foxm1	Down	Activation
zf-C2H2	Klf10	Up	Arntl	Down	Repression
zf-C2H2	Mtf1	Down	Mt1	Up	Activation
zf-C2H2	Wt1	Up	Wnt4	Up	Regulates
THR-like	Nr1d1	Up	Arntl	Down	Repression
THR-like	Nr1i3	Up	Akr1b7	Up	Activation
THR-like	Nr1i3	Up	Cyp2b10	Down	Regulates
THR-like	Ppard	Down	Angptl4	Up	Repression
TF_bZIP	Atf3	Up	Atf3	Up	Repression
TF_bZIP	Atf3	Up	Ccnd1	Down	Activation
TF_bZIP	Junb	Up	Ccnd1	Down	Repression
PAX	Pax5	Up	Blk	Up	Activation
PAX	Pax5	Up	Cd19	Up	Regulates
PAX	Pax5	Up	Cd79a	Up	Activation
MYB	Mybl2	Up	Sftpa1	Up	Activation
HMG	Sox9	Down	Cdkn1a	Down	Activation
HMG	Sox9	Down	Vnn1	Up	Activation
ETS	Spib	Up	Fcer2a	Up	Activation
ESR-like	Esr1	Down	Ccnd1	Down	Regulates
ESR-like	Esr1	Down	Cdkn1a	Down	Repression
E2F	E2f2	Down	Chek1	Down	Repression
E2F	E2f2	Down	Mcm5	Down	Repression
C/EBP	Cebpb	Up	Atf3	Up	Regulates
C/EBP	Cebpb	Up	Btg2	Down	Regulates
C/EBP	Cebpb	Up	Cdkn1a	Down	Regulates
C/EBP	Cebpb	Up	Gsta2	Up	Activation
C/EBP	Cebpb	Up	Hgf	Down	Regulates
bHLH	Arntl	Down	Dbp	Up	Regulates
bHLH	Id1	Up	Cdkn1a	Down	Repression
bHLH	Mlxipl	Up	Scd1	Down	Activation
TF, transcription factor.

## Sheet: Table S5
Table SV. A total of 191 proteins were identified.
ID	Name	P-value	Log2(FC)	Regulation
E9Q3V2	Slc35a3	2.5x10^-6	1.71164	Up
Q8R2Q8	Bst2	1.0x10^-5	0.432219	Up
Q64345	Ifit3	2.6x10^-5	0.645942	Up
Q3UKT3	Oat	3.0x10^-5	-0.568875	Down
Q58E61	Igh	3.8x10^-5	-0.724053	Down
A0A075B5V1	Ighv1-31	4.2x10^-5	-1.41107	Down
Q60739	Bag1	4.3x10^-5	0.28633	Up
Q3U635	Irgm2	4.6x10^-5	1.09875	Up
Q8R0Y6	Aldh1l1	4.7x10^-5	-0.311935	Down
P12710	Fabp1	7.5x10^-5	0.42312	Up
O89051	Itm2b	8.6x10^-5	0.603861	Up
Q8VBW8	Ttc36	9.5x10^-5	-0.432306	Down
P05201	Got1	1.0x10^-4	-0.521513	Down
Q99LH2	Ptdss1	1.0x10^-4	-0.565752	Down
Q3UDH2	Oasl2	1.3x10^-4	0.698692	Up
A0A075B5S2	Ighv7-1	1.5x10^-4	-1.03215	Down
A0A171EBL2	Rnf213	1.8x10^-4	0.641328	Up
Q9DCY0	Keg1	1.9x10^-4	0.482014	Up
Q3TXL5	Ctsd	2.3x10^-4	0.49592	Up
Q91XB0	Trex1	2.6x10^-4	0.411924	Up
Q5F2I8	IgG1 TS1 VH	2.7x10^-4	-0.746593	Down
Q9R013	Ctsf	2.8x10^-4	0.444458	Up
Q8QZR3	Ces2a	3.1x10^-4	0.301431	Up
Q9EST5	Anp32b	3.1x10^-4	-0.388982	Down
Q3U5Q7	Cmpk2	3.2x10^-4	0.29592	Up
Q8R387	Aox1	3.2x10^-4	0.377746	Up
Q8K3M1	Rdh16f2	3.4x10^-4	-0.48073	Down
Q6PJ91	Gstm7	3.4x10^-4	0.595429	Up
Q496S1	Adh4	3.6x10^-4	-0.329527	Down
A0A3Q4L347	Cdo1	3.7x10^-4	-0.714002	Down
Q9ET22	Dpp7	3.9x10^-4	0.292742	Up
Q07797	Lgals3bp	4.0x10^-4	0.480234	Up
Q8BI08	Mal2	4.0x10^-4	0.31057	Up
Q9DBE0	Csad	4.4x10^-4	0.728586	Up
Q8VCN5	Cth	4.8x10^-4	-0.390999	Down
F8WI88	Pcnp	5.1x10^-4	0.393684	Up
Q9WVA2	Timm8a1	5.5x10^-4	-1.05576	Down
P06802	Enpp1	5.7x10^-4	-0.297086	Down
Q60766	Irgm1	5.8x10^-4	0.396624	Up
Q9CZS1	Aldh1b1	6.0x10^-4	-0.504839	Down
Q64339	Isg15	6.3x10^-4	0.506029	Up
Q3UVL4	Vps51	6.4x10^-4	0.685251	Up
Q8C7I4	Apol9b	6.9x10^-4	0.57295	Up
D3Z5K6	Dnajc19	7.0x10^-4	0.284844	Up
P11928	Oas1a	7.5x10^-4	0.343567	Up
Q3TDB6	Slc31a1	7.5x10^-4	-0.388061	Down
T1ECW4	Rbpms	7.9x10^-4	0.276106	Up
Q8CHR6	Dpyd	8.3x10^-4	-0.269119	Down
Q3TLX1	Nampt	8.3x10^-4	0.303242	Up
Q9DCE9	Igtp	8.3x10^-4	0.725745	Up
Q9D323	Stat1	8.4x10^-4	0.593383	Up
Q64282	Ifit1	8.4x10^-4	0.61931	Up
Q8VBT2	Sds	8.7x10^-4	-0.576911	Down
Q8BK48	Ces2e	9.6x10^-4	0.427248	Up
A0A494B908	Gstp1	1.0x10^-3	0.538223	Up
E9PV41	Diaph1	1.0x10^-3	-0.368103	Down
Q61805	Lbp	1.0x10^-3	0.382187	Up
Q8VBX5	Ppt1	1.0x10^-3	0.306421	Up
P10649	Gstm1	1.1x10^-3	0.335375	Up
Q9CY18	Snx7	1.1x10^-3	0.417815	Up
P33587	Proc	1.1x10^-3	-0.300908	Down
Q61586	Gpam	1.1x10^-3	0.273194	Up
Q62073	Map3k7	1.3x10^-3	0.473959	Up
Q920L1	Fads1	1.3x10^-3	-0.263299	Down
Q00915	Rbp1	1.3x10^-3	-0.468625	Down
Q6PGF7	Exoc8	1.5x10^-3	0.59796	Up
Q8BHC4	Dcakd	1.5x10^-3	0.400487	Up
Q8R519	Acmsd	1.6x10^-3	-0.639274	Down
Q9DCB8	Isca2	1.6x10^-3	-0.428766	Down
Q8R3Q0	Saraf	1.6x10^-3	0.35931	Up
Q2TAW4	Myh6	1.7x10^-3	-0.664535	Down
Q9Z0K8	Vnn1	1.7x10^-3	0.439642	Up
Q4FJX5	Dhcr7	1.8x10^-3	-0.470403	Down
Q9D379	Ephx1	1.8x10^-3	0.331281	Up
Q9CPX4	Ftl1	1.8x10^-3	0.751758	Up
O35945	Aldh1a7	1.9x10^-3	-0.273777	Down
P63094	Gnas	1.9x10^-3	0.295337	Up
P55258	Rab8a	2.1x10^-3	-0.410494	Down
Q3TMB3	Fdps	2.1x10^-3	-0.638299	Down
Q80VP1	Epn1	2.1x10^-3	-0.279337	Down
Q9CQW9	Ifitm3	2.2x10^-3	0.334464	Up
Q62293	Tgtp1	2.2x10^-3	0.780675	Up
Q05DG8	Slc22a18	2.2x10^-3	0.50127	Up
Q9QZ85	Iigp1	2.2x10^-3	0.989193	Up
O88545	Cops6	2.4x10^-3	0.288924	Up
O55239	Nnmt	2.9x10^-3	-1.20457	Down
P01592	Jchain	3.0x10^-3	-0.425227	Down
E9QNL5	Sult1a1	3.1x10^-3	-0.488197	Down
O08692	Ngp	3.1x10^-3	0.314334	Up
Q91Z40	Gbp7	3.1x10^-3	0.292683	Up
P28650	Adss1	3.1x10^-3	-0.280446	Down
P16460	Ass1	3.4x10^-3	-0.365758	Down
Q5XJX8	Mrps9	3.5x10^-3	0.30616	Up
D3Z3L3	Trim12c	3.6x10^-3	0.267637	Up
Q71KT5	Tm7sf2	3.6x10^-3	-0.308172	Down
Q3TGW2	Eepd1	3.9x10^-3	-0.327122	Down
A0A075B5N3	Igkv8-28	3.9x10^-3	-0.7734	Down
A0A0J9YU92	Fbxo21	3.9x10^-3	0.480827	Up
A4FUU4	Retsat	4.0x10^-3	0.293909	Up
Q9WVL2	Stat2	4.0x10^-3	0.304732	Up
Q91WG0	Ces2c	4.3x10^-3	0.515309	Up
P28230	Gjb1	4.7x10^-3	-0.371879	Down
Q9QUJ7	Acsl4	5.2x10^-3	-0.308172	Down
Q9D172	Gatd3	5.2x10^-3	-0.359969	Down
D3YWU1	Trafd1	5.3x10^-3	0.336287	Up
P31532	Saa4	5.7x10^-3	0.307266	Up
M0QWS9	Gm4340	5.8x10^-3	0.423709	Up
Q8C141	Acss2	5.8x10^-3	-0.432219	Down
Q8BTS3	Gbp9	6.2x10^-3	0.29767	Up
Q9XR35	H2-T23	6.2x10^-3	0.264463	Up
E0CXW2	Adck5	6.2x10^-3	0.305515	Up
Q91X83	Mat1a	6.3x10^-3	-0.502705	Down
Q9R1R8	Rdh11	6.3x10^-3	-0.381013	Down
A2AUR3	Pter	6.3x10^-3	-0.330955	Down
A2ATU0	Dhtkd1	7.1x10^-3	-0.584121	Down
Q61635	Ifi47	7.1x10^-3	0.447323	Up
Q9JMC8	Epb41l4b	7.7x10^-3	0.284524	Up
Q8BGD8	Coa6	7.9x10^-3	0.323875	Up
P55050	Fabp2	8.1x10^-3	0.336219	Up
Q80WF6	Slc26a1	8.1x10^-3	-0.3096	Down
Q8CBB9	Rsad2	8.5x10^-3	0.769455	Up
A0A0G2JDJ5	Fdps	8.6x10^-3	-1.13482	Down
Q9EP82	Wdr4	8.6x10^-3	-0.27759	Down
O19443	H2-M10.1	8.7x10^-3	0.584001	Up
Q3UU34	Larp1	9.1x10^-3	-0.346682	Down
A0A1Y7VNH4	Zfyve21	1.0x10^-2	-0.326279	Down
Q0GUM3	Gm12250	1.0x10^-2	0.333294	Up
F8WIP7	Dpf2	1.0x10^-2	0.270602	Up
Q61767	Hsd3b4	1.1x10^-2	0.409822	Up
Q8R059	Gale	1.1x10^-2	-0.316994	Down
Q05117	Acp5	1.1x10^-2	0.357697	Up
P30933	Svs5	1.1x10^-2	2.42041	Up
Q7TMM9	Tubb2a	1.1x10^-2	-0.274941	Down
D3YU12	Nmral1	1.1x10^-2	0.283416	Up
O35639	Anxa3	1.2x10^-2	-0.729736	Down
P04939	Mup3	1.2x10^-2	0.412177	Up
Q99LD9	Eif2b2	1.3x10^-2	-0.40629	Down
P24472	Gsta4	1.3x10^-2	0.274941	Up
Q3TED3	Acly	1.3x10^-2	-0.533689	Down
Q9D268	Svs6	1.3x10^-2	0.993512	Up
E9Q7C8	Cyp2c40	1.4x10^-2	0.284581	Up
Q8K354	Cbr3	1.4x10^-2	0.365832	Up
Q05144	Rac2	1.5x10^-2	0.285747	Up
Q3UEB4	Mvk	1.5x10^-2	-0.595551	Down
E9PY03	Tstd1	1.5x10^-2	0.564795	Up
Q64367	Sva	1.5x10^-2	1.27548	Up
O35490	Bhmt	1.5x10^-2	-0.273777	Down
Q8VCB3	Gys2	1.6x10^-2	0.311091	Up
Q8BZH8	Svs3b	1.6x10^-2	0.789531	Up
D3Z458	Msmo1	1.7x10^-2	-0.84535	Down
D3Z041	Acsl1	1.7x10^-2	0.276106	Up
Q60634	Flot2	1.7x10^-2	-0.287175	Down
Q61696	Hspa1a	1.7x10^-2	0.288603	Up
Q9DD20	Tmt1b	1.7x10^-2	-0.401076	Down
Q3UDS4	Sqor	1.9x10^-2	-0.289186	Down
Q9D7I5	Lhpp	1.9x10^-2	-0.625353	Down
A0A0G2JDV3	Gbp6	2.0x10^-2	0.439391	Up
A0A1Y7VN70	Glrx5	2.1x10^-2	0.272294	Up
A0A140T8P5	Igkv8-24	2.1x10^-2	-0.538223	Down
P13516	Scd1	2.2x10^-2	-0.564069	Down
Q3TQP6	Me1	2.2x10^-2	0.37841	Up
O88829	St3gal5	2.3x10^-2	0.357295	Up
Q91WV7	Slc3a1	2.3x10^-2	-0.385457	Down
Q8CJH3	Plxnb1	2.4x10^-2	-0.372209	Down
O88822	Sc5d	2.4x10^-2	-0.470499	Down
Q8C129	Lnpep	2.4x10^-2	0.39486	Up
Q8C9P2	Gvin-ps7	2.5x10^-2	0.563354	Up
Q9Z0S1	Bpnt1	2.6x10^-2	-0.496514	Down
A0A0B6VMB2	HC	2.6x10^-2	-0.486169	Down
O08579	Emd	2.6x10^-2	0.271448	Up
Q8VCH6	Dhcr24	2.7x10^-2	-0.363156	Down
Q8R084	Ugt2b1	2.9x10^-2	0.281931	Up
Q4FZJ1	Aoc1l2	3.0x10^-2	1.03324	Up
L7N451	Gvin1	3.0x10^-2	0.586766	Up
Q8BS30	Semg1	3.2x10^-2	1.51051	Up
A6PWX8	Uqcc1	3.2x10^-2	-0.470154	Down
Q91WU7	Itih1	3.3x10^-2	-0.304348	Down
Q8BYA0	Tbcd	3.6x10^-2	0.271129	Up
P19096	Fasn	3.6x10^-2	-0.451711	Down
Q3UEL5	Uroc1	3.6x10^-2	-0.297991	Down
Q9QYC7	Ggcx	3.7x10^-2	-0.375475	Down
O88983	Stx8	3.7x10^-2	-0.371367	Down
Q5SWU9	Acaca	3.8x10^-2	-0.277271	Down
G3X925	Pklr	3.9x10^-2	0.292421	Up
Q61285	Abcd2	4.0x10^-2	-0.316866	Down
Q5FW60	Mup20	4.1x10^-2	0.54646	Up
F8WIV2	Serpinb6a	4.2x10^-2	-0.328876	Down
O35114	Scarb2	4.5x10^-2	0.381932	Up
D3YV21	Nars2	4.6x10^-2	0.277215	Up
Q62264	Thrsp	4.6x10^-2	-0.877071	Down
Q8VI94	Oasl1	4.7x10^-2	0.392174	Up
FC, fold change.

## Sheet: Table S6
Table SVI. GO enrichment analysis highlights key functional categories in proteomics.
ID	Category	Term	P-value	Substances
GO:0005525	Molecular_function	GTP binding	9.0x10^-7	A0A0G2JDV3:Gbp6,P28650:Adss1,P55258:Rab8a,P63094:Gnas,Q05144:Rac2,Q0GUM3:Gm12250,Q60766:Irgm1,Q62293:Tgtp1,Q7TMM9:Tubb2a,Q91Z40:Gbp7,Q9DCE9:Igtp,Q9QZ85:Iigp1,Q99LD9:Eif2b2
GO:0003924	Molecular_function	GTPase activity	3.7x10^-6	A0A0G2JDV3:Gbp6,P28650:Adss1,P55258:Rab8a,P63094:Gnas,Q05144:Rac2,Q60766:Irgm1,Q62293:Tgtp1,Q7TMM9:Tubb2a,Q91Z40:Gbp7,Q9DCE9:Igtp,Q9QZ85:Iigp1
GO:0047376	Molecular_function	All-trans-retinyl-palmitate hydrolase, all-trans-retinol forming activity	1.6x10^-5	Q8BK48:Ces2e,Q8QZR3:Ces2a,Q91WG0:Ces2c
GO:0050253	Molecular_function	Retinyl-palmitate esterase activity	3.5x10^-5	Q8BK48:Ces2e,Q8QZR3:Ces2a,Q91WG0:Ces2c
GO:0102209	Molecular_function	Trans-permethrin hydrolase activity	4.5x10^-5	Q8BK48:Ces2e,Q8QZR3:Ces2a
GO:0106435	Molecular_function	Carboxylesterase activity	8.2x10^-5	Q8BK48:Ces2e,Q8QZR3:Ces2a,Q91WG0:Ces2c
GO:0004029	Molecular_function	Aldehyde dehydrogenase (NAD+) activity	1.5x10^-4	O35945:Aldh1a7,Q8R0Y6:Aldh1l1,Q9CZS1:Aldh1b1
GO:0005324	Molecular_function	Long-chain fatty acid transporter activity	2.7x10^-4	P12710:Fabp1,Q61285:Abcd2,P55050:Fabp2
GO:0003925	Molecular_function	G protein activity	4.5x10^-4	P63094:Gnas,Q0GUM3:Gm12250,Q60766:Irgm1,Q9DCE9:Igtp
GO:0030170	Molecular_function	Pyridoxal phosphate binding	4.5x10^-4	P05201:Got1,Q8VBT2:Sds,Q8VCN5:Cth,Q9DBE0:Csad
GO:0020005	Cellular_component	Symbiont-containing vacuole membrane	5.9x10^-6	A0A0G2JDV3:Gbp6,Q91Z40:Gbp7,Q9QZ85:Iigp1
GO:0005789	Cellular_component	Endoplasmic reticulum membrane	7.0x10^-5	P13516:Scd1,Q60766:Irgm1,Q61767:Hsd3b4,Q62293:Tgtp1,Q71KT5:Tm7sf2,Q8CBB9:Rsad2,Q8VCH6:Dhcr24,Q91XB0:Trex1,Q920L1:Fads1,Q99LH2:Ptdss1,Q9D379:Ephx1,Q9DCE9:Igtp,Q9QUJ7:Acsl4,Q9QZ85:Iigp1,O88822:Sc5d,Q9QYC7:Ggcx,Q8R3Q0:Saraf,Q9DD20:Tmt1b
GO:0005811	Cellular_component	Lipid droplet	7.1x10^-5	Q00915:Rbp1,Q60766:Irgm1,Q8CBB9:Rsad2,Q9DCE9:Igtp,Q9QUJ7:Acsl4,Q9DD20:Tmt1b
GO:0005739	Cellular_component	Mitochondrion	8.6x10^-5	P11928:Oas1a,P16460:Ass1,P19096:Fasn,Q3U5Q7:Cmpk2,Q5SWU9:Acaca,Q60766:Irgm1,Q61285:Abcd2,Q61586:Gpam,Q61696:Hspa1a,Q61767:Hsd3b4,Q8CBB9:Rsad2,Q8R0Y6:Aldh1l1,Q8VBT2:Sds,Q920L1:Fads1,Q9DCE9:Igtp,Q9QUJ7:Acsl4,A2ATU0:Dhtkd1,Q64345:Ifit3,Q9CZS1:Aldh1b1,Q8BGD8:Coa6,Q9DCB8:Isca2,Q9DCY0:Keg1,Q9WVA2:Timm8a1,Q8BHC4:Dcakd,Q9D172:Gatd3
GO:0005783	Cellular_component	Endoplasmic reticulum	1.5x10^-4	O08579:Emd,P11928:Oas1a,P13516:Scd1,P33587:Proc,Q60766:Irgm1,Q61767:Hsd3b4,Q71KT5:Tm7sf2,Q8BK48:Ces2e,Q8CBB9:Rsad2,Q8QZR3:Ces2a,Q8VCH6:Dhcr24,Q91WG0:Ces2c,Q91XB0:Trex1,Q9CQW9:Ifitm3,Q9DCE9:Igtp,Q9QUJ7:Acsl4,Q99LD9:Eif2b2,Q9R013:Ctsf,Q8R3Q0:Saraf
GO:0005829	Cellular_component	Cytosol	4.2x10^-4	O35945:Aldh1a7,O55239:Nnmt,O88983:Stx8,P04939:Mup3,P05201:Got1,P10649:Gstm1,P11928:Oas1a,P12710:Fabp1,P16460:Ass1,P19096:Fasn,P63094:Gnas,Q00915:Rbp1,Q05144:Rac2,Q3UVL4:Vps51,Q5SWU9:Acaca,Q60739:Bag1,Q60766:Irgm1,Q61696:Hspa1a,Q62073:Map3k7,Q62264:Thrsp,Q64282:Ifit1,Q80VP1:Epn1,Q8CHR6:Dpyd,Q8R059:Gale,Q8R0Y6:Aldh1l1,Q8VBT2:Sds,Q8VCB3:Gys2,Q8VCN5:Cth,Q91X83:Mat1a,Q91XB0:Trex1,Q9DCE9:Igtp,Q9JMC8:Ep…
GO:0030659	Cellular_component	Cytoplasmic vesicle membrane	1.3x10^-3	P55258:Rab8a,Q0GUM3:Gm12250,Q8C129:Lnpep,Q91Z40:Gbp7,Q9DCE9:Igtp
GO:0045179	Cellular_component	Apical cortex	1.9x10^-3	P12710:Fabp1,P55050:Fabp2
GO:0031410	Cellular_component	Cytoplasmic vesicle	5.8x10^-3	A0A0G2JDV3:Gbp6,O08692:Ngp,P55258:Rab8a,Q60634:Flot2,Q91Z40:Gbp7,Q9CQW9:Ifitm3,Q9ET22:Dpp7
GO:0030670	Cellular_component	Phagocytic vesicle membrane	9.3x10^-3	O35639:Anxa3,P55258:Rab8a,Q60766:Irgm1
GO:0035458	Biological_process	Cellular response to interferon-β	1.7x10^-12	A0A0G2JDV3:Gbp6,P11928:Oas1a,Q60766:Irgm1,Q62293:Tgtp1,Q64282:Ifit1,Q91XB0:Trex1,Q91Z40:Gbp7,Q9DCE9:Igtp,Q9QZ85:Iigp1,Q64345:Ifit3
GO:0051607	Biological_process	Defense response to virus	1.0x10^-9	P11928:Oas1a,Q0GUM3:Gm12250,Q61586:Gpam,Q64282:Ifit1,Q64339:Isg15,Q8CBB9:Rsad2,Q8R2Q8:Bst2,Q91XB0:Trex1,Q91Z40:Gbp7,Q9CQW9:Ifitm3,Q9WVL2:Stat2,Q64345:Ifit3,Q8VI94:Oasl1
GO:0009615	Biological_process	Response to virus	6.5x10^-9	P11928:Oas1a,Q62293:Tgtp1,Q64282:Ifit1,Q64339:Isg15,Q8CBB9:Rsad2,Q8R2Q8:Bst2,Q9CQW9:Ifitm3,Q64345:Ifit3,Q8VI94:Oasl1
GO:0042832	Biological_process	Defense response to protozoan	7.0x10^-9	A0A0G2JDV3:Gbp6,P06802:Enpp1,Q0GUM3:Gm12250,Q62293:Tgtp1,Q91Z40:Gbp7,Q9DCE9:Igtp,Q9QZ85:Iigp1
GO:0009617	Biological_process	Response to bacterium	1.6x10^-8	A0A0G2JDV3:Gbp6,P13516:Scd1,Q0GUM3:Gm12250,Q60766:Irgm1,Q61285:Abcd2,Q62264:Thrsp,Q62293:Tgtp1,Q64282:Ifit1,Q64339:Isg15,Q9QZ85:Iigp1,Q64345:Ifit3
GO:0045071	Biological_process	Negative regulation of viral genome replication	2.7x10^-7	P11928:Oas1a,Q64339:Isg15,Q8CBB9:Rsad2,Q8R2Q8:Bst2,Q9CQW9:Ifitm3,Q8VI94:Oasl1
GO:0006952	Biological_process	Defense response	3.1x10^-7	O08692:Ngp,Q60766:Irgm1,Q62293:Tgtp1,Q9DCE9:Igtp,Q9QZ85:Iigp1,Q9WVL2:Stat2
GO:0045087	Biological_process	Innate immune response	6.2x10^-6	P01592:Jchain,Q0GUM3:Gm12250,Q60766:Irgm1,Q61805:Lbp,Q64282:Ifit1,Q64339:Isg15,Q8CBB9:Rsad2,Q8R2Q8:Bst2,Q91XB0:Trex1,Q9DCE9:Igtp,Q9QZ85:Iigp1,Q9Z0K8:Vnn1,Q8VI94:Oasl1
GO:0008610	Biological_process	Lipid biosynthetic process	7.1x10^-6	P13516:Scd1,P19096:Fasn,Q5SWU9:Acaca,Q9QUJ7:Acsl4
GO:0006693	Biological_process	Prostaglandin metabolic process	1.6x10^-5	P10649:Gstm1,Q8BK48:Ces2e,Q8QZR3:Ces2a,Q91WG0:Ces2c
GO, Gene Ontology.

## Sheet: Table S7
Table SVII. Kyoto Encyclopedia of Genes and Genomes database-based pathway enrichment analysis of differentially expressed proteins.
ID	Term	Classification	P-value	Substances
Mmu01100	Metabolic pathways	Metabolism	6.44835e-06	Q9Z0S1|Q9CZS1|Q8K354|P28650|G3X925|Q8VCN5|Q8K3M1|A0A494B908|Q05117|P06802|P05201|Q71KT5|Q3UDS4|Q9DBE0|Q8R059|A0A0G2JDJ5|Q8C129|D3Z458|Q8VCH6|Q8R519|Q4FJX5|Q8R387|Q8C141|Q8VCB3|Q9QUJ7|Q3U5Q7|O88822|Q9QYC7|Q3UKT3|A2ATU0|Q8VBX5|Q3TQP6|Q3UEB4|Q8CHR6|Q9R1R8|Q8R084|Q5SWU9|O35490|O88829|Q61767|Q9Z0K8|D3Z041|P24472|O35945|Q9DCY0|O55239|A0A1Y7VNH4|Q64459|Q8BHC4|P16460|P10649|Q3UEL5|Q8R0Y6|Q8VBT2|P19096|Q6…
Mmu00100	Steroid biosynthesis	Metabolism	0.000139249	O88822|Q4FJX5|Q71KT5|Q8R059|D3Z458|Q8VCH6
Mmu05204	Chemical carcinogenesis - DNA adducts	Human diseases	0.000455142	Q6PJ91|Q8K354|E9Q7C8|P24472|E9QNL5|A0A494B908|Q64459|P10649|Q8R084|Q9D379
Mmu00770	Pantothenate and CoA biosynthesis	Metabolism	0.000361144	Q9Z0K8|O35945|P06802|Q8BHC4|Q9DBE0|Q8CHR6|Q9CZS1
Mmu05168	Herpes simplex virus 1 infection	Human diseases	0.00118048	P11928|Q8VI94|Q7TS98|M0QWS9|Q9XR35|O19443|Q8R2Q8|Q99LD9|Q62073|Q9WVL2|Q9EST5|Q9D323|D3YWU1|Q3UDH2
Mmu00830	Retinol metabolism	Metabolism	0.00107971	Q8R387|Q8K354|E9Q7C8|Q64459|Q8K3M1|O35945|A4FUU4|Q8R0Y6|Q496S1|Q9R1R8|Q8R084|Q9CZS1
Mmu00980	Metabolism of xenobiotics by cytochrome P450	Metabolism	0.00321876	Q6PJ91|Q8K354|P24472|A0A494B908|P10649|Q496S1|Q8R084|Q9D379
Mmu00983	Drug metabolism - other enzymes	Metabolism	0.00276033	Q8R387|P24472|Q8BK48|A0A494B908|Q91WG0|Q8QZR3|Q6PJ91|P10649|Q8CHR6|Q8R084
Mmu04620	Toll-like receptor signaling pathway	Organismal systems	0.00317151	Q05144|Q61805|Q9R013|Q62073|Q9WVL2|Q9D323|D3YWU1
Mmu01240	Biosynthesis of cofactors	Metabolism	0.00271123	Q91X83|Q9CZS1|Q8K354|P28650|G3X925|O35945|Q9QYC7|Q8BHC4|Q9D7I5|Q9R1R8|Q8CHR6|P19096|Q8R084|Q3U5Q7|Q8VCH6
Mmu05145	Toxoplasmosis	Human diseases	0.00822077	Q7TS98|Q61696|Q60766|Q3U635|P63094|Q62073|Q9WVL2|Q9DCE9|Q9D323
Mmu05160	Hepatitis C	Human diseases	0.00962311	Q8CBB9|P11928|Q64345|Q8VI94|Q64282|Q9WVL2|Q9D323|D3YWU1|O35114|Q3UDH2
Mmu00350	Tyrosine metabolism	Metabolism	0.00920247	Q8R387|O55239|P05201|Q9DBE0|Q496S1|Q4FZJ1
Mmu00270	Cysteine and methionine metabolism	Metabolism	0.00779658	Q91X83|O35490|Q8VCN5|A0A3Q4L347|Q3UKT3|P05201|Q8VBT2
Mmu04621	NOD-like receptor signaling pathway	Organismal systems	0.0149903	P11928|Q8VI94|Q91Z40|O08692|Q3TLX1|Q62073|Q9WVL2|Q9D323|D3YWU1|Q3UDH2
Mmu00982	Drug metabolism - cytochrome P450	Metabolism	0.0120325	Q6PJ91|P24472|A0A494B908|Q8R387|P10649|Q496S1|Q8R084
Mmu00250	Alanine, aspartate and glutamate metabolism	Metabolism	0.0166298	Q9Z0K8|P28650|Q3UKT3|P05201|P16460|Q9DBE0
Mmu04380	Osteoclast differentiation	Organismal systems	0.0161531	Q05144|Q05117|Q9R013|Q62073|Q9WVL2|Q9D323|A0A0B6VMB2
Mmu05164	Influenza A	Human diseases	0.0148988	Q3UDH2|P11928|A0A0G2JDJ5|Q3TMB3|Q7TS98|Q9WVL2|Q9EST5|Q8VI94|Q9D323|D3YWU1|Q8CBB9
Mmu04940	Type I diabetes mellitus	Human diseases	0.0118495	Q9XR35|O19443|Q7TS98|Q9DBE0
Mmu05169	Epstein-Barr virus infection	Human diseases	0.0147988	Q64339|Q05144|Q8VI94|Q7TS98|Q9XR35|O88545|O19443|Q62073|Q9WVL2|Q9D323|D3YWU1|P11928|Q3UDH2
Mmu00360	Phenylalanine metabolism	Metabolism	0.0142604	P05201|Q9DCY0|Q9DBE0|Q4FZJ1
Mmu00780	Biotin metabolism	Metabolism	0.0213943	P19096|Q9Z0K8
Mmu03320	PPAR signaling pathway	Organismal systems	0.0226835	Q64339|P12710|D3Z041|P13516|Q61805|Q3TQP6|Q9QUJ7|P55050|O35114
Mmu04920	Adipocytokine signaling pathway	Organismal systems	0.0249671	Q5SWU9|D3Z041|Q9WVL2|Q9QUJ7|Q9D323|O35114
Mmu01230	Biosynthesis of amino acids	Metabolism	0.0241618	O35490|Q91X83|Q5SWU9|G3X925|Q8VCN5|P05201|P16460|Q8VBT2
Mmu05162	Measles	Human diseases	0.0207592	P11928|Q8VI94|Q61696|Q62073|Q9WVL2|Q9D323|D3YWU1|Q3UDH2
Mmu00380	Tryptophan metabolism	Metabolism	0.0207592	Q8R519|O35945|Q8R387|Q9CZS1|O55239|A2ATU0|Q9DBE0|Q4FZJ1
Mmu00900	Terpenoid backbone biosynthesis	Metabolism	0.0277835	A0A0G2JDJ5|Q3UEB4|Q3TMB3
Mmu05207	Chemical carcinogenesis - receptor activation	Human diseases	0.0320038	Q6PJ91|P24472|A0A494B908|Q64459|P63094|P10649|Q9WVL2|Q9D323|Q8R084|Q9D379
Mmu00740	Riboflavin metabolism	Metabolism	0.0310733	Q05117|P06802
Mmu05330	Allograft rejection	Human diseases	0.0335144	Q9XR35|O19443|Q7TS98
Mmu05332	Graft-versus-host disease	Human diseases	0.0335144	Q9XR35|O19443|Q7TS98
Mmu05321	Inflammatory bowel disease	Human diseases	0.0335144	Q9D323|Q9WVL2|Q7TS98
Mmu00340	Histidine metabolism	Metabolism	0.0308301	O35945|Q9CZS1|Q3UEL5|Q4FZJ1
Mmu00760	Nicotinate and nicotinamide metabolism	Metabolism	0.0396816	O55239|Q8R387|P06802|Q3TLX1
Mmu00330	Arginine and proline metabolism	Metabolism	0.0468493	O35945|P05201|Q9CZS1|Q3UKT3|Q4FZJ1
Mmu04975	Fat digestion and absorption	Organismal systems	0.044596	P12710|P05201|P55050|O35114
Mmu04614	Renin-angiotensin system	Organismal systems	0.0466573	Q3TXL5|Q9ET22|Q8C129
Mmu05320	AutoiMmune thyroid disease	Human diseases	0.0466573	Q9XR35|O19443|Q7TS98
PPAR, peroxisome proliferator-activated receptor.

## Sheet: Table S8
Table SVIII. Differential protein interaction network analysis.
Accession	Gene name	Label	Fold change	Degree
A0A075B5V1	Ighv1-31	A0A075B5V1:Ighv1-31	0.376032	0
O55239	Nnmt	O55239:Nnmt	0.433897	14
A0A0G2JDJ5	Fdps	A0A0G2JDJ5:Fdps	0.455392	0
Q9WVA2	Timm8a1	Q9WVA2:Timm8a1	0.481043	3
A0A075B5S2	Ighv7-1	A0A075B5S2:Ighv7-1	0.488982	0
Q62264	Thrsp	Q62264:Thrsp	0.544472	24
D3Z458	Msmo1	D3Z458:Msmo1	0.556576	0
A0A075B5N3	Igkv8-28	A0A075B5N3:Igkv8-28	0.585037	0
Q5F2I8	IgG1 TS1 VH	Q5F2I8:IgG1 TS1 VH	0.59601	0
O35639	Anxa3	O35639:Anxa3	0.603014	5
Q58E61	Igh	Q58E61:Igh	0.605394	0
A0A3Q4L347	Cdo1	A0A3Q4L347:Cdo1	0.609627	0
Q2TAW4	Myh6	Q2TAW4:Myh6	0.630892	0
Q8R519	Acmsd	Q8R519:Acmsd	0.642036	21
Q3TMB3	Fdps	Q3TMB3:Fdps	0.64247	0
Q9D7I5	Lhpp	Q9D7I5:Lhpp	0.648261	5
Q3UEB4	Mvk	Q3UEB4:Mvk	0.661792	0
A2ATU0	Dhtkd1	A2ATU0:Dhtkd1	0.667056	21
Q8VBT2	Sds	Q8VBT2:Sds	0.670398	32
Q3UKT3	Oat	Q3UKT3:Oat	0.674142	0
Q99LH2	Ptdss1	Q99LH2:Ptdss1	0.675603	9
P13516	Scd1	P13516:Scd1	0.676392	27
A0A140T8P5	Igkv8-24	A0A140T8P5:Igkv8-24	0.688619	0
Q3TED3	Acly	Q3TED3:Acly	0.690786	0
P05201	Got1	P05201:Got1	0.696641	24
Q9CZS1	Aldh1b1	Q9CZS1:Aldh1b1	0.704739	30
Q91X83	Mat1a	Q91X83:Mat1a	0.705782	37
Q9Z0S1	Bpnt1	Q9Z0S1:Bpnt1	0.708817	7
E9QNL5	Sult1a1	E9QNL5:Sult1a1	0.712915	0
A0A0B6VMB2	HC	A0A0B6VMB2:HC	0.713918	0
Q8K3M1	Rdh16f2	Q8K3M1:Rdh16f2	0.716615	0
O88822	Sc5d	O88822:Sc5d	0.721715	13
Q4FJX5	Dhcr7	Q4FJX5:Dhcr7	0.721763	0
A6PWX8	Uqcc1	A6PWX8:Uqcc1	0.721887	0
Q00915	Rbp1	Q00915:Rbp1	0.722653	8
P19096	Fasn	P19096:Fasn	0.731175	43
Q8VBW8	Ttc36	Q8VBW8:Ttc36	0.741076	23
Q8C141	Acss2	Q8C141:Acss2	0.741121	0
Q9DCB8	Isca2	Q9DCB8:Isca2	0.742897	6
P01592	Jchain	P01592:Jchain	0.744722	8
P55258	Rab8a	P55258:Rab8a	0.752366	9
Q99LD9	Eif2b2	Q99LD9:Eif2b2	0.754561	3
Q9DD20	Tmt1b	Q9DD20:Tmt1b	0.757293	26
Q8VCN5	Cth	Q8VCN5:Cth	0.762601	31
Q9EST5	Anp32b	Q9EST5:Anp32b	0.763668	0
Q3TDB6	Slc31a1	Q3TDB6:Slc31a1	0.764156	0
Q91WV7	Slc3a1	Q91WV7:Slc3a1	0.765537	24
Q9R1R8	Rdh11	Q9R1R8:Rdh11	0.767898	0
Q9QYC7	Ggcx	Q9QYC7:Ggcx	0.770852	4
Q8CJH3	Plxnb1	Q8CJH3:Plxnb1	0.772598	1
P28230	Gjb1	P28230:Gjb1	0.772776	8
O88983	Stx8	O88983:Stx8	0.77305	8
E9PV41	Diaph1	E9PV41:Diaph1	0.7748	0
P16460	Ass1	P16460:Ass1	0.776061	31
Q8VCH6	Dhcr24	Q8VCH6:Dhcr24	0.777462	20
Q9D172	Gatd3	Q9D172:Gatd3	0.779181	1
Q3UU34	Larp1	Q3UU34:Larp1	0.78639	0
A2AUR3	Pter	A2AUR3:Pter	0.79501	0
Q496S1	Adh4	Q496S1:Adh4	0.795797	0
F8WIV2	Serpinb6a	F8WIV2:Serpinb6a	0.796157	0
Q3TGW2	Eepd1	Q3TGW2:Eepd1	0.797125	7
A0A1Y7VNH4	Zfyve21	A0A1Y7VNH4:Zfyve21	0.797591	0
Q8R059	Gale	Q8R059:Gale	0.802741	16
Q61285	Abcd2	Q61285:Abcd2	0.802812	6
Q8R0Y6	Aldh1l1	Q8R0Y6:Aldh1l1	0.805561	32
Q80WF6	Slc26a1	Q80WF6:Slc26a1	0.806865	0
Q71KT5	Tm7sf2	Q71KT5:Tm7sf2	0.807664	19
Q9QUJ7	Acsl4	Q9QUJ7:Acsl4	0.807664	20
Q91WU7	Itih1	Q91WU7:Itih1	0.809808	0
P33587	Proc	P33587:Proc	0.811741	22
Q3UEL5	Uroc1	Q3UEL5:Uroc1	0.813384	0
P06802	Enpp1	P06802:Enpp1	0.813894	7
Q3UDS4	Sqor	Q3UDS4:Sqor	0.818364	0
Q60634	Flot2	Q60634:Flot2	0.819505	7
P28650	Adss1	P28650:Adss1	0.823336	16
Q80VP1	Epn1	Q80VP1:Epn1	0.823969	6
Q9EP82	Wdr4	Q9EP82:Wdr4	0.824968	2
Q5SWU9	Acaca	Q5SWU9:Acaca	0.825151	26
Q7TMM9	Tubb2a	Q7TMM9:Tubb2a	0.826484	18
O35945	Aldh1a7	O35945:Aldh1a7	0.827151	38
O35490	Bhmt	O35490:Bhmt	0.827151	33
Q8CHR6	Dpyd	Q8CHR6:Dpyd	0.829826	34
Q920L1	Fads1	Q920L1:Fads1	0.833181	17
Q9XR35	H2-T23	Q9XR35:H2-T23	1.20119	0
D3Z3L3	Trim12c	D3Z3L3:Trim12c	1.20383	0
F8WIP7	Dpf2	F8WIP7:Dpf2	1.20631	0
Q8BYA0	Tbcd	Q8BYA0:Tbcd	1.20675	7
O08579	Emd	O08579:Emd	1.20702	4
A0A1Y7VN70	Glrx5	A0A1Y7VN70:Glrx5	1.20773	0
Q61586	Gpam	Q61586:Gpam	1.20848	17
P24472	Gsta4	P24472:Gsta4	1.20994	14
T1ECW4	Rbpms	T1ECW4:Rbpms	1.21092	0
D3Z041	Acsl1	D3Z041:Acsl1	1.21092	0
D3YV21	Nars2	D3YV21:Nars2	1.21185	0
Q8R084	Ugt2b1	Q8R084:Ugt2b1	1.21582	0
D3YU12	Nmral1	D3YU12:Nmral1	1.21707	0
Q9JMC8	Epb41l4b	Q9JMC8:Epb41l4b	1.21801	2
E9Q7C8	Cyp2c40	E9Q7C8:Cyp2c40	1.21806	0
D3Z5K6	Dnajc19	D3Z5K6:Dnajc19	1.21828	0
Q05144	Rac2	Q05144:Rac2	1.21904	20
Q60739	Bag1	Q60739:Bag1	1.21953	2
Q61696	Hspa1a	Q61696:Hspa1a	1.22146	23
O88545	Cops6	O88545:Cops6	1.22173	7
G3X925	Pklr	G3X925:Pklr	1.22469	0
Q91Z40	Gbp7	Q91Z40:Gbp7	1.22492	18
Q9ET22	Dpp7	Q9ET22:Dpp7	1.22497	7
A4FUU4	Retsat	A4FUU4:Retsat	1.22596	0
P63094	Gnas	P63094:Gnas	1.22717	0
Q3U5Q7	Cmpk2	Q3U5Q7:Cmpk2	1.22767	26
Q8BTS3	Gbp9	Q8BTS3:Gbp9	1.22916	0
Q8QZR3	Ces2a	Q8QZR3:Ces2a	1.23237	23
Q3TLX1	Nampt	Q3TLX1:Nampt	1.23391	0
Q9WVL2	Stat2	Q9WVL2:Stat2	1.23519	21
E0CXW2	Adck5	E0CXW2:Adck5	1.23586	0
Q5XJX8	Mrps9	Q5XJX8:Mrps9	1.23641	0
Q8VBX5	Ppt1	Q8VBX5:Ppt1	1.23664	0
P31532	Saa4	P31532:Saa4	1.23736	13
Q8BI08	Mal2	Q8BI08:Mal2	1.2402	5
Q8VCB3	Gys2	Q8VCB3:Gys2	1.24065	38
O08692	Ngp	O08692:Ngp	1.24344	1
Q8BGD8	Coa6	Q8BGD8:Coa6	1.25169	2
Q9D379	Ephx1	Q9D379:Ephx1	1.25813	29
Q0GUM3	Gm12250	Q0GUM3:Gm12250	1.25989	4
Q9CQW9	Ifitm3	Q9CQW9:Ifitm3	1.26091	25
P10649	Gstm1	P10649:Gstm1	1.26171	23
P55050	Fabp2	P55050:Fabp2	1.26244	24
D3YWU1	Trafd1	D3YWU1:Trafd1	1.2625	0
P11928	Oas1a	P11928:Oas1a	1.26889	17
O88829	St3gal5	O88829:St3gal5	1.28102	2
Q05117	Acp5	Q05117:Acp5	1.28138	13
Q8R3Q0	Saraf	Q8R3Q0:Saraf	1.28281	5
Q8K354	Cbr3	Q8K354:Cbr3	1.28862	16
Q8R387	Aox1	Q8R387:Aox1	1.29931	0
Q3TQP6	Me1	Q3TQP6:Me1	1.29991	0
O35114	Scarb2	O35114:Scarb2	1.30309	18
Q61805	Lbp	Q61805:Lbp	1.30332	7
Q8VI94	Oasl1	Q8VI94:Oasl1	1.31237	23
F8WI88	Pcnp	F8WI88:Pcnp	1.31374	0
Q8C129	Lnpep	Q8C129:Lnpep	1.31481	5
Q60766	Irgm1	Q60766:Irgm1	1.31642	20
Q8BHC4	Dcakd	Q8BHC4:Dcakd	1.31995	10
Q61767	Hsd3b4	Q61767:Hsd3b4	1.32852	17
Q91XB0	Trex1	Q91XB0:Trex1	1.33046	17
P04939	Mup3	P04939:Mup3	1.33069	18
Q9CY18	Snx7	Q9CY18:Snx7	1.3359	7
P12710	Fabp1	P12710:Fabp1	1.34082	29
M0QWS9	Gm4340	M0QWS9:Gm4340	1.34137	0
Q8BK48	Ces2e	Q8BK48:Ces2e	1.34467	20
Q8R2Q8	Bst2	Q8R2Q8:Bst2	1.34931	19
A0A0G2JDV3	Gbp6	A0A0G2JDV3:Gbp6	1.35603	17
Q9Z0K8	Vnn1	Q9Z0K8:Vnn1	1.35627	23
Q9R013	Ctsf	Q9R013:Ctsf	1.3608	8
Q61635	Ifi47	Q61635:Ifi47	1.36351	0
Q62073	Map3k7	Q62073:Map3k7	1.38892	9
Q07797	Lgals3bp	Q07797:Lgals3bp	1.39497	19
A0A0J9YU92	Fbxo21	A0A0J9YU92:Fbxo21	1.39554	0
Q9DCY0	Keg1	Q9DCY0:Keg1	1.39669	19
Q3TXL5	Ctsd	Q3TXL5:Ctsd	1.41022	0
Q05DG8	Slc22a18	Q05DG8:Slc22a18	1.41546	0
Q64339	Isg15	Q64339:Isg15	1.42014	26
Q91WG0	Ces2c	Q91WG0:Ces2c	1.4293	24
A0A494B908	Gstp1	A0A494B908:Gstp1	1.45218	0
Q5FW60	Mup20	Q5FW60:Mup20	1.4605	11
Q8C9P2	Gvin-ps7	Q8C9P2:Gvin-ps7	1.4777	0
E9PY03	Tstd1	E9PY03:Tstd1	1.47918	0
Q8C7I4	Apol9b	Q8C7I4:Apol9b	1.48756	0
O19443	H2-M10.1	O19443:H2-M10.1	1.499	0
L7N451	Gvin1	L7N451:Gvin1	1.50188	0
Q9D323	Stat1	Q9D323:Stat1	1.50878	0
Q6PJ91	Gstm7	Q6PJ91:Gstm7	1.51092	0
Q6PGF7	Exoc8	Q6PGF7:Exoc8	1.51357	7
O89051	Itm2b	O89051:Itm2b	1.51978	5
Q64282	Ifit1	Q64282:Ifit1	1.53614	24
A0A171EBL2	Rnf213	A0A171EBL2:Rnf213	1.55976	0
Q64345	Ifit3	Q64345:Ifit3	1.56476	21
Q3UVL4	Vps51	Q3UVL4:Vps51	1.60798	4
Q3UDH2	Oasl2	Q3UDH2:Oasl2	1.62303	0
Q9DCE9	Igtp	Q9DCE9:Igtp	1.65375	21
Q9DBE0	Csad	Q9DBE0:Csad	1.65701	16
Q9CPX4	Ftl1	Q9CPX4:Ftl1	1.68384	0
Q8CBB9	Rsad2	Q8CBB9:Rsad2	1.70463	21
Q62293	Tgtp1	Q62293:Tgtp1	1.71793	17
Q8BZH8	Svs3b	Q8BZH8:Svs3b	1.72851	0
Q9QZ85	Iigp1	Q9QZ85:Iigp1	1.98507	22
Q9D268	Svs6	Q9D268:Svs6	1.99103	0
Q4FZJ1	Aoc1l2	Q4FZJ1:Aoc1l2	2.04662	0
Q3U635	Irgm2	Q3U635:Irgm2	2.14169	0
Q64367	Sva	Q64367:Sva	2.4208	0
Q8BS30	Semg1	Q8BS30:Semg1	2.84911	0
E9Q3V2	Slc35a3	E9Q3V2:Slc35a3	3.27533	0
P30933	Svs5	P30933:Svs5	5.35324	0

## Sheet: Table S9
Table SIX. A total of 193 metabolites were identified.
Metabolites	HMDB	METLIN	Lipidmaps	KEGG	VIP	P-value	Log2(FC)	Regulation
Cholylserine	HMDB0242388				1.01659	2.0x10^-2	9.12562	up
S-(5-Hydroxy-1-methoxy-1-oxoicosa-7,9,11,14-tetraen-6-yl)cysteine		331338			1.34892	4.7x10^-2	8.94742	up
PIP(20:1(11Z)/22:6(5Z,8E,10Z,13Z,15E,19Z)-2OH(7S, 17S))	HMDB0279624				3.54265	4.9x10^-2	8.52337	up
Met-Arg-Phe-Ala acetate salt		44690			1.1228	3.3x10^-2	6.82287	up
Erinacine D	HMDB0031896	88013			1.04155	4.3x10^-2	6.7792	up
icas#22			LMFA13040116		1.39273	4.7x10^-2	5.2481	up
N-Palmitoyl tyrosine	HMDB0062340	75480	LMFA08020098		1.28168	3.1x10^-2	5.10754	up
Glycohyocholic acid	HMDB0240607				1.56586	3.0x10^-2	4.96145	up
PIM1(19:2(9Z,12Z)/16:2(9Z,12Z))			LMGP15010047		13.8665	3.0x10^-2	4.85641	up
Sulfolithocholylglycine	HMDB0002639	6725	LMST05030004	C11301	8.11975	3.8x10^-2	4.49759	up
Niraxostat	HMDB0255624	450986			1.38063	1.6x10^-2	4.46861	up
N-[(3a,5b,7b)-7-hydroxy-24-oxo-3-(sulfooxy)cholan-24-yl]-Glycine	HMDB0002409	57988	LMST05030012		2.54319	4.1x10^-2	4.21825	up
N-(7α-Hydroxy-3-oxochol-4-en-24-oyl)-taurine			LMST05040022		1.09216	4.7x10^-2	4.20896	up
5-Iodoacetamidofluorescein	HMDB0246814	340149			1.65854	4.5x10^-2	4.10236	up
O-propanoyl-carnitine		36668	LMFA07070005	C03017	7.37039	6.0x10^-6	3.98416	up
Streptomycin	HMDB0015214	2496		C00413	6.36227	2.4x10^-2	3.94957	up
Retinoyl-AZT	HMDB0257175				2.94834	1.9x10^-2	3.93437	up
PIP(22:6(4Z,7Z,10Z,13E,15E,19Z)-OH(17)/22:2(13Z,16Z))	HMDB0280262				1.92149	4.6x10^-2	3.71132	up
PIP(20:3(8Z,11Z,14Z)-2OH(5,6)/22:2(13Z,16Z))	HMDB0280222				10.51	2.3x10^-2	3.67827	up
Dihydrostreptomycin	HMDB0251330				1.29522	3.8x10^-2	3.6152	up
Casopitant	HMDB0249696				1.08969	4.4x10^-2	3.09377	up
Phenol glucuronide	HMDB0060014	1825			1.8896	2.1x10^-2	3.05196	up
p-Cresol sulfate	HMDB0011635	62391		C06677	1.57086	6.0x10^-3	3.04921	up
Taurodeoxycholic acid	HMDB0000896	5853	LMST05040013	C05463	7.42256	3.7x10^-2	2.81208	up
5β-Cyprinolsulfate			LMST05020004	C05468	1.81114	4.7x10^-2	2.79819	up
2β,3β-Dihydroxy-6-oxo-5α-cholan-24-oic Acid			LMST04010172		3.11014	3.4x10^-2	2.77298	up
(2S,3R)-3-Hydroxy-2-methylbutanoylcarnitine	HMDB0241646				2.42307	2.8x10^-9	2.57367	up
Tauro-α-muricholic acid	HMDB0258742				5.47333	2.6x10^-2	2.56368	up
TEMANOGREL	HMDB0258797				2.16348	3.6x10^-2	2.51459	up
3'-Hydroxy-T2 Toxin	HMDB0036601	91661			2.20836	3.3x10^-2	2.51334	up
p-Tolyl-ss-D-glucuronide	HMDB0256060				2.30272	1.2x10^-2	2.43673	up
Phenylacetylglycine	HMDB0000821	4237		C05598	2.22852	7.8x10^-4	2.43168	up
Phenol sulphate	HMDB0060015			C02180	1.66454	4.1x10^-3	2.25857	up
3-[(3-Carboxycyclohexyl)carbamoyl]-4-{3-[4-(4-phenoxybutoxy)phenyl]propoxy}benzoic acid		331197			2.82565	4.9x10^-2	2.23584	up
Valylaspartic acid	HMDB0029123	23822			2.72348	1.6x10^-8	2.11604	up
γ-Glutamylthreonine	HMDB0029159	86051			3.08291	2.4x10^-4	2.09072	up
Tetrahydrofolyl-[Glu](n)	HMDB0006826	58561		C03541	1.85121	4.2x10^-2	2.08711	up
7-O-acetyl-6-epi-19,20-epoxycytochalasin P			LMPK11000018		12.2908	5.0x10^-3	2.06218	up
Batrachotoxinin A 20-α-benzoate	HMDB0248883				3.50467	4.9x10^-2	1.99015	up
Trinexapac-ethyl	HMDB0259248			C18541	1.13272	2.8x10^-2	1.97038	up
Kinetensin 1-8	HMDB0012985	412259			3.20494	1.1x10^-3	1.95926	up
Indoxyl sulfate	HMDB0000682	253			2.12853	2.4x10^-4	1.92797	up
S-Adenosylmethionine		3289		C00019	2.29828	2.2x10^-4	1.8693	up
POB-PS			LMGP20040017		1.38899	9.9x10^-5	1.86897	up
Sandoricin	HMDB0037555	92412			1.28825	1.1x10^-2	1.83673	up
Benzoylhypaconine	HMDB0249052				1.06253	4.4x10^-2	1.77315	up
N-Methacryloyl-L-glutamic acid	HMDB0255166				1.71638	2.8x10^-6	1.74632	up
Lysylhydroxyproline	HMDB0028952				1.57226	1.3x10^-3	1.67345	up
PI(20:5(5Z,8Z,11Z,14Z,17Z)/0:0)			LMGP06050026		2.40498	1.2x10^-3	1.65037	up
3-Amino-3-methylbutanoic acid	HMDB0245806	449944			13.2346	3.2x10^-6	1.63572	up
Isoleucyl-Asparagine	HMDB0028902				1.80121	4.4x10^-6	1.57374	up
Glutamyltyrosine	HMDB0028831	23927			1.01309	2.8x10^-3	1.53467	up
γ-L-Glutamyl-S-(2-carboxy-1-propyl)cysteinylglycine	HMDB0029394	86239			1.97555	6.5x10^-3	1.50561	up
Methyl 2-(3-(((3-(6-amino-2-butoxy-8-oxo-7,8-dihydro-9H-purin-9-yl)propyl)(3-morpholinopropyl)amino)methyl)phenyl)acetate	HMDB0248790				1.56744	1.0x10^-2	1.48677	up
(Z)-Resveratrol 3,4'-diglucoside	HMDB0039910	94453			1.86271	6.9x10^-3	1.45868	up
Glycerylphosphorylcholine	HMDB0252858				1.15863	3.0x10^-3	1.45753	up
2,4-Xylenesulfonic acid monohydrate		984420			1.24549	1.4x10^-4	1.43093	up
Proline βine	HMDB0004827	7089		C10172	4.06875	2.9x10^-6	1.41802	up
Prolyl-Glutamine	HMDB0029015				1.66617	3.4x10^-4	1.41394	up
Ophthalmic acid	HMDB0005765	58300			6.66113	2.3x10^-4	1.36801	up
Uridine diphosphate glucose	HMDB0000286	3598		C00029	1.63811	4.4x10^-2	1.35019	up
Glycerophosphocholine	HMDB0000086	370		C00670	9.23427	4.8x10^-3	1.34154	up
2-Hydroxyarctiin	HMDB0302482				1.00961	1.2x10^-3	1.30693	up
Glutamylleucine	HMDB0028823	44684			1.24181	4.9x10^-3	1.28257	up
Ser-Tyr	HMDB0258243	85944			1.22278	1.0x10^-2	1.27	up
1-Nitro-5-glutathionyl-6-hydroxy-5,6-dihydronaphthalene	HMDB0060326	70338		C14806	4.98299	5.5x10^-3	1.24421	up
Apigenin 7-(2''-glucuronosyllactate)		48809	LMPK12110378		1.44895	4.3x10^-3	1.23087	up
Glycerylphosphorylethanolamine	HMDB0000114	5151		C01233	1.46354	3.5x10^-3	1.18254	up
Dipotassium phosphate	HMDB0303424			C13197	1.91905	2.7x10^-3	1.1811	up
(2R)-2-Amino-2-[[(1S)-1-carboxyethyl]amino]-4-methylpentanoic acid	HMDB0242765				1.37166	1.5x10^-2	1.18096	up
Inosinic acid	HMDB0000175	5196		C00130	3.03906	8.2x10^-3	1.1387	up
15-keto Latanoprost		45712			2.29429	2.3x10^-2	1.12896	up
Heptadeacsphing-6E-enine 4R-sufate			LMSP01080072		1.08412	2.5x10^-4	1.11535	up
Glycyl-Methionine	HMDB0028847				1.10112	1.9x10^-4	1.11204	up
Octadec-6-enoylcarnitine	HMDB0241528				1.03325	2.4x10^-2	1.09241	up
γ-Glutamylleucine	HMDB0011171	23750			1.11967	1.1x10^-3	1.07886	up
Alepramic acid			LMFA01140031		2.14503	6.1x10^-5	1.0381	up
(8Z,11Z,13E,15S)-15-Hydroxyicosa-8,11,13-trienoylcarnitine	HMDB0241584				1.02646	4.7x10^-2	0.981775	up
O-Linoleoylcarnitine	HMDB0240780		LMFA07070092		1.31079	1.7x10^-2	0.946014	up
VU 0357121		433737			2.00042	1.0x10^-2	0.9064	up
5'-N-Ethylcarboxamidoadenosine	HMDB0255498				2.5722	7.0x10^-3	0.833139	up
Alanylglutamine	HMDB0028685	85601			1.14229	2.1x10^-2	0.807534	up
N-(1-Deoxy-1-fructosyl)valine	HMDB0037844	92652			1.2376	1.6x10^-2	0.789688	up
Hypoglycin B	HMDB0029428	66881		C08280	1.08917	1.5x10^-2	0.776974	up
Phenylalanylthreonine	HMDB0029005	23662			1.14772	1.9x10^-3	0.759832	up
2,3,4,5,6-Pentafluorobenzamide	HMDB0245431	353165			1.01871	1.3x10^-2	0.726734	up
Alvelestat	HMDB0248264				1.34718	1.6x10^-2	0.711103	up
Gluconic acid	HMDB0000625	345		C00257	5.84012	1.1x10^-2	0.680233	up
Glycerophosphoglycerol	HMDB0240316				2.08447	1.7x10^-3	0.672303	up
α-Dimorphecolic acid	HMDB0004670	45662	LMFA02000188	C14767	1.93279	4.0x10^-3	0.668084	up
D-Glutamine	HMDB0003423	6926		C00819	6.26739	5.9x10^-3	0.6678	up
Isovalerylcarnitine	HMDB0000688		LMFA07070076		1.09112	2.9x10^-3	0.660454	up
L-Glutamic acid	HMDB0000148	19		C00025	1.80142	1.4x10^-2	0.639224	up
9S,10S,11R-trihydroxy-12Z-octadecenoic acid		74943	LMFA02000011		1.34303	1.5x10^-2	0.638498	up
Biotin pantothenate	HMDB0249228				1.40813	1.9x10^-3	0.637746	up
N-(1-Deoxy-1-fructosyl)alanine	HMDB0038662	93320			1.14971	7.2x10^-3	0.597367	up
Uridine 5'-monophosphate	HMDB0000288			C00105	3.12705	1.7x10^-2	0.594012	up
Isoleucylproline	HMDB0011174	23858			1.94309	8.7x10^-4	0.583916	up
9R,12S,13S-trihydroxyoctadec-10E-enoic acid			LMFA02000340		1.43715	1.9x10^-2	0.576749	up
γ-Glutamylglutamic acid	HMDB0011737	62460		C05282	1.28586	3.6x10^-4	0.541514	up
13-Oxo-9,11-octadecadienoic acid	HMDB0246143				1.005	1.1x10^-2	0.528998	up
3-Aminobutanoic acid	HMDB0031654	87838			1.05922	1.1x10^-2	0.505394	up
Glycyl-Isoleucine	HMDB0028844				1.05301	8.2x10^-3	0.504323	up
Aceneuramic acid	HMDB0259583				1.1695	1.3x10^-2	0.489812	up
sorbitol lactate	HMDB0258395				2.47073	2.7x10^-2	0.450771	up
(S1)-Methoxy-3-heptanethiol	HMDB0032380	88407			1.34926	2.1x10^-3	0.448071	up
L-Carnitine	HMDB0000062			C00318	4.73492	3.0x10^-3	0.443553	up
Dephospho-CoA	HMDB0001373	3689	LMFA07050315	C00882	1.66404	2.4x10^-2	0.420385	up
D-Malic acid	HMDB0031518	63096		C00497	3.07909	2.3x10^-2	0.399078	up
LysoPC(20:3(8Z,11Z,14Z)/0:0)	HMDB0010394	61704	LMGP01050133		1.30079	3.2x10^-2	0.39651	up
β-D-Glucosamine	HMDB0030091	266		C08349	1.52494	4.0x10^-2	0.382473	up
Polyribosylribitolphosphate	HMDB0249913				2.14294	1.5x10^-2	0.37327	up
[(2R,5R)-5-(6-Aminopurin-9-yl)-4-hydroxy-2-(hydroxymethyl)oxolan-3-yl] dihydrogen phosphate	HMDB0258140				4.15373	1.4x10^-2	0.351478	up
PE(P-18:1(11Z)/20:4(5Z,8Z,11Z,13E)-OH(15S))	HMDB0285394				1.58933	1.5x10^-2	0.343368	up
(S)-a-Amino-2,5-dihydro-5-oxo-4-isoxazolepropanoic acid N2-glucoside	HMDB0029404	86247			1.20783	4.4x10^-2	0.291272	up
PA(20:3(5Z,8Z,11Z)/18:0)	HMDB0115123				1.08482	5.4x10^-3	0.264604	up
Citramalic acid	HMDB0000426	3273		C00815	1.03366	3.6x10^-2	0.262682	up
Daf-FM DA	HMDB0250829	451837			1.4986	2.2x10^-3	0.250239	up
Niacinamide	HMDB0001406	1497		C00153	6.72423	1.3x10^-2	0.195278	up
LysoPC(0:0/16:0)	HMDB0240262	40340	LMGP01050074		4.81385	4.8x10^-2	-0.166292	down
Heptafluorobutyric acid	HMDB0253102	336951			1.4336	2.8x10^-2	-0.18965	down
Psilocybine	HMDB0256899	322565		C07576	5.46814	3.2x10^-2	-0.196886	down
alhpa-tocopheronolactone		53844	LMPR02020063		1.72626	3.1x10^-2	-0.23	down
Oxidized glutathione	HMDB0003337	322837		C00127	4.51593	2.9x10^-2	-0.238359	down
PHHdiA-PE			LMGP20020017		1.78516	1.4x10^-3	-0.238738	down
Glutaric acid	HMDB0000661	3254		C00489	1.13575	2.2x10^-2	-0.263151	down
5-Hydroxyoctadecanoylcarnitine	HMDB0241522				1.17852	3.5x10^-2	-0.267467	down
LysoPC(17:0/0:0)	HMDB0012108	24068	LMGP01050024	C04230	3.11907	9.8x10^-3	-0.267858	down
LysoPG(18:1(9Z)/0:0)	HMDB0240602	40878	LMGP04050006		1.15505	1.1x10^-2	-0.281622	down
Indoleacrylic acid	HMDB0000734	5702			3.0109	1.0x10^-2	-0.288022	down
5β-cholest-22E-en-3β-ol		83934	LMST01010333		5.74819	1.6x10^-2	-0.309295	down
1-O-(2-methoxy-4Z-hexadecenyl)-sn-glycero-3-phosphocholine			LMGP01060043		8.04663	1.7x10^-2	-0.309809	down
Modiolide A			LMFA07040142		1.18455	2.8x10^-2	-0.320827	down
Emulphor	HMDB0251781				2.95688	3.0x10^-2	-0.362367	down
(1R,4R,5S,6R)-4-Amino-2-oxabicyclo[3.1.0]hexane-4,6-dicarboxylic acid	HMDB0242337				1.13355	8.7x10^-3	-0.362542	down
13-Heptadecyn-1-ol	HMDB0013813	85269			1.00859	1.7x10^-2	-0.368211	down
LysoPS(18:2(9Z,12Z)/0:0)	HMDB0240604	78838	LMGP03050011		1.57187	2.9x10^-3	-0.368576	down
NORETHINDRONE ACETATE		44171		C08152	3.64944	5.4x10^-3	-0.373201	down
(2R,5S)-5-Amino-1,2,6,7-tetrahydroxyoctane-3,4-dione	HMDB0255319				1.89156	3.5x10^-2	-0.398516	down
4-Aminophenylmannoside	HMDB0246178				4.14461	3.0x10^-3	-0.406983	down
Butyryl trihexyl citrate	HMDB0247498	318431			1.32756	4.8x10^-3	-0.413803	down
α-D-Glucose	HMDB0003345	6897		C00267	8.11218	2.0x10^-3	-0.417318	down
Kojibiose	HMDB0011742	62465		C19632	4.57855	9.7x10^-3	-0.450309	down
LysoPE(0:0/18:0)	HMDB0011129	61992	LMGP02050038		3.72581	2.7x10^-2	-0.451777	down
PE(19:0/20:2(11Z,14Z))		77018	LMGP02010783		4.61426	2.8x10^-3	-0.503086	down
Ergothioneine	HMDB0003045	53		C05570	4.07152	6.8x10^-4	-0.503635	down
4-Dodecylbenzenesulfonic Acid	HMDB0059915	324404			3.59421	1.4x10^-3	-0.525282	down
Dansylglutamyl-glycyl-arginine chloromethyl ketone	HMDB0250847				2.02824	3.4x10^-2	-0.542994	down
LysoPE(0:0/16:0)	HMDB0011473	62261	LMGP02050036		10.6027	3.7x10^-4	-0.543113	down
4-Hydroxydecanoyl-CoA	HMDB0300864				1.13411	4.5x10^-2	-0.547383	down
LysoPE(0:0/16:1(9Z))	HMDB0011474	62262	LMGP02050037		2.23358	1.8x10^-3	-0.587789	down
DG(15:1(9Z)/16:1(9Z)/0:0)[iso2]		98418	LMGL02010451		1.67596	3.6x10^-2	-0.598134	down
LysoPE(20:1(11Z)/0:0)	HMDB0011512	62297	LMGP02050020		1.05584	6.4x10^-3	-0.607281	down
Coumestan	HMDB0250498				1.5759	3.5x10^-4	-0.608196	down
Sophoracoumestan A		48327	LMPK12090013		3.01204	1.1x10^-2	-0.612706	down
LysoPG(16:0/0:0)	HMDB0240601	46733	LMGP04050008		1.29645	4.4x10^-3	-0.614775	down
4-Trimethylammoniobutanoic acid	HMDB0001161			C01181	1.03293	5.2x10^-3	-0.617976	down
Cefadroxil	HMDB0015271	3948		C06878	1.18333	4.5x10^-2	-0.63169	down
Heptaethylene glycol monododecyl ether	HMDB0251574	347359			2.4237	6.7x10^-4	-0.641669	down
Octaethyleneglycol monododecyl ether	HMDB0246126				2.35118	5.4x10^-4	-0.648473	down
S-(Formylmethyl)glutathione	HMDB0060507	70375		C14871	1.52107	3.1x10^-2	-0.683939	down
Polidocanol	HMDB0256665	69582		C13493	2.23702	5.8x10^-4	-0.689079	down
OKODA-PS			LMGP20040033		1.98921	1.2x10^-2	-0.703795	down
Norethandrolone	HMDB0255730				2.20133	1.6x10^-3	-0.71419	down
LysoPI(16:0/0:0)	HMDB0061695		LMGP06050002		4.99153	2.4x10^-3	-0.721264	down
LysoPE(0:0/22:5(7Z,10Z,13Z,16Z,19Z))	HMDB0011495	62283	LMGP02050059		2.29688	6.8x10^-3	-0.722231	down
Maltotriose	HMDB0001262	3585		C01835	5.3198	7.6x10^-3	-0.727625	down
Basilimoside	HMDB0302040				1.59659	2.2x10^-2	-0.732542	down
cyclic RGD	HMDB0250625				1.6816	4.0x10^-3	-0.737381	down
Avenin	HMDB0248738	338418			1.17262	2.3x10^-2	-0.740004	down
PG-PG			LMGP20060016		1.19677	3.0x10^-4	-0.788498	down
Syringetin 3-(4''',6'''-diacetylglucosyl)(1->3)-galactoside			LMPK12112486		1.91206	3.2x10^-2	-0.815638	down
Isopentenyladenine-9-N-glucoside	HMDB0012240	62882			1.52443	1.2x10^-2	-0.819332	down
Vitamin D3 sulfate	HMDB0259848				1.36952	6.6x10^-3	-0.826186	down
PC(18:1(9Z)-O(12,13)/18:0)	HMDB0286266				3.0193	4.5x10^-2	-0.837674	down
Hildgardtene		47498	LMPK12020282		1.08769	9.9x10^-4	-0.839611	down
Dipyridamole	HMDB0015110	2341		C06964	1.06407	2.8x10^-4	-0.862478	down
4'-O-methyl-(-)-epicatechin-3'-O-β-glucuronide	HMDB0029180	86068			4.92615	1.9x10^-2	-0.863883	down
N-Undecylbenzenesulfonic acid	HMDB0032549	88521			2.57453	5.1x10^-3	-0.892754	down
Asparaginyl-Methionine	HMDB0028737	23817			2.25836	6.7x10^-4	-0.908021	down
Palmitoylethanolamide	HMDB0002100	43210	LMFA08040013	C16512	1.13483	4.4x10^-3	-0.937195	down
2-(S-Glutathionyl)acetyl glutathione	HMDB0060343	70368		C14863	1.71812	1.9x10^-3	-0.982492	down
PE(18:1(12Z)-O(9S,10R)/P-16:0)	HMDB0285227				5.25069	1.1x10^-3	-1.03762	down
Fosinopril	HMDB0014635			C07016	1.28458	3.7x10^-2	-1.05409	down
5-(1,1-Dihydroxythiazinan-2-yl)-N-[(4-fluorophenyl)methyl]-8-hydroxy-1,6-naphthyridine-7-carboxamide	HMDB0257960				1.62893	1.5x10^-3	-1.09841	down
4-(4-Fluorophenyl)-2-(4-methylsulfinylphenyl)-5-(4-pyridyl)-1H-imidazole	HMDB0244686	45450			1.66713	3.5x10^-2	-1.10408	down
5S-HETE di-endoperoxide		74966	LMFA03000011		1.39559	3.6x10^-2	-1.16266	down
(1R,4Ar,7S)-1,4a,7-Trimethyl-7-vinyl-1,2,3,4,4a,6,7,8,8a,9,10,10a-dodecahydro-phenanthrene-1-carboxylic acid	HMDB0242332				1.40496	3.6x10^-4	-1.17586	down
11-cis-3,4-didehydroretinol		41506	LMPR01090010		1.97925	1.1x10^-2	-1.27946	down
5-Hydroxy-3,8-dimethoxy-3',4'-methylenedioxy-7-prenyloxyflavone		51639	LMPK12113227		1.2563	8.4x10^-3	-1.45434	down
(S)-4-(4-((2-(3,5-Dimethylphenyl)pyrrolidin-1-yl)Methyl)phenoxy)-3-fluorobenzaMide	HMDB0244422				1.79219	7.1x10^-4	-1.57919	down
Chelerythrine		96495			1.03581	1.8x10^-3	-1.77083	down
Kaplanin			LMPK12110143		1.03605	1.3x10^-3	-2.79285	down
FC, fold change; HMDB, Human Metabolome Database; KEGG, Kyoto Encyclopedia of Genes and Genomes; VIP, variable importance in projection.

## Sheet: Table S10
Table SX. Differentially expressed metabolite correlation matrix in the angiotensin-converting enzyme 2-knockout group vs. control group.
DEM	PIM1(19:2(9Z,12Z)/16:2(9Z,12Z))	3-Amino-3-methylbutanoic acid	7-O-acetyl-6-epi-19,20-epoxycytochalasin P	LysoPE(0:0/16:0)	PIP(20:3(8Z,11Z,14Z)-2OH(5,6)/22:2(13Z,16Z))	Glycerophosphocholine	Sulfolithocholylglycine	α-D-Glucose	1-O-(2-methoxy-4Z-hexadecenyl)-sn-glycero-3-phosphocholine	Taurodeoxycholic acid	O-propanoyl-carnitine	Niacinamide	Ophthalmic acid	Streptomycin	D-Glutamine	Gluconic acid	5β-cholest-22E-en-3β-ol	Tauro-α-muricholic acid	Psilocybine	Maltotriose
PIM1(19:2(9Z,12Z)/16:2(9Z,12Z))	1	0.641744	0.972004	-0.512615	0.997751	0.648702	0.996068	-0.763939	-0.498078	0.996059	0.633813	0.56388	0.753996	0.992452	0.799144	0.515143	-0.678995	0.991737	-0.411353	-0.679514
3-Amino-3-methylbutanoic acid	0.641744	1	0.776823	-0.817894	0.65827	0.847362	0.618035	-0.816322	-0.678859	0.611955	0.998509	0.793324	0.917671	0.671553	0.870498	0.824102	-0.739725	0.636616	-0.664807	-0.738357
7-O-acetyl-6-epi-19,20-epoxycytochalasin P	0.972004	0.776823	1	-0.663601	0.973517	0.736314	0.963769	-0.82953	-0.616643	0.958234	0.771542	0.695206	0.84369	0.98225	0.861761	0.631653	-0.711112	0.95913	-0.463726	-0.732198
LysoPE(0:0/16:0)	-0.512615	-0.817894	-0.663601	1	-0.534009	-0.602589	-0.500583	0.794389	0.814826	-0.493356	-0.818692	-0.6586	-0.754123	-0.548708	-0.542171	-0.579396	0.525575	-0.522019	0.485259	0.759083
PIP(20:3(8Z,11Z,14Z)-2OH(5,6)/22:2(13Z,16Z))	0.997751	0.65827	0.973517	-0.534009	1	0.670218	0.99029	-0.774452	-0.508504	0.996761	0.649924	0.581602	0.758096	0.985842	0.809469	0.509437	-0.690276	0.997043	-0.440642	-0.686207
Glycerophosphocholine	0.648702	0.847362	0.736314	-0.602589	0.670218	1	0.643012	-0.723978	-0.636875	0.64927	0.862892	0.807704	0.814739	0.670141	0.856454	0.827532	-0.858153	0.669354	-0.581164	-0.641691
Sulfolithocholylglycine	0.996068	0.618035	0.963769	-0.500583	0.99029	0.643012	1	-0.752667	-0.503901	0.993456	0.612392	0.535704	0.754636	0.993921	0.768776	0.535123	-0.68276	0.984656	-0.370478	-0.684147
α-D-Glucose	-0.763939	-0.816322	-0.82953	0.794389	-0.774452	-0.723978	-0.752667	1	0.872759	-0.738967	-0.826398	-0.731632	-0.752866	-0.783729	-0.777196	-0.640932	0.828523	-0.759162	0.521606	0.703377
1-O-(2-methoxy-4Z-hexadecenyl)-sn-glycero-3-phosphocholine	-0.498078	-0.678859	-0.616643	0.814826	-0.508504	-0.636875	-0.503901	0.872759	1	-0.471718	-0.703553	-0.7458	-0.565659	-0.54728	-0.522861	-0.62266	0.748976	-0.492839	0.414728	0.500437
Taurodeoxycholic acid	0.996059	0.611955	0.958234	-0.493356	0.996761	0.64927	0.993456	-0.738967	-0.471718	1	0.603756	0.531436	0.738845	0.982232	0.774009	0.488949	-0.671842	0.997128	-0.400542	-0.678424
O-propanoyl-carnitine	0.633813	0.998509	0.771542	-0.818692	0.649924	0.862892	0.612392	-0.826398	-0.703553	0.603756	1	0.807759	0.91359	0.667325	0.870535	0.8393	-0.756888	0.627737	-0.652249	-0.735569
Niacinamide	0.56388	0.793324	0.695206	-0.6586	0.581602	0.807704	0.535704	-0.731632	-0.7458	0.531436	0.807759	1	0.603711	0.595717	0.809479	0.616541	-0.705927	0.556503	-0.659008	-0.461028
Ophthalmic acid	0.753996	0.917671	0.84369	-0.754123	0.758096	0.814739	0.754636	-0.752866	-0.565659	0.738845	0.91359	0.603711	1	0.788134	0.815158	0.853343	-0.686137	0.742434	-0.463847	-0.854183
Streptomycin	0.992452	0.671553	0.98225	-0.548708	0.985842	0.670141	0.993921	-0.783729	-0.54728	0.982232	0.667325	0.595717	0.788134	1	0.809198	0.580636	-0.687954	0.973154	-0.374804	-0.700621
D-Glutamine	0.799144	0.870498	0.861761	-0.542171	0.809469	0.856454	0.768776	-0.777196	-0.522861	0.774009	0.870535	0.809479	0.815158	0.809198	1	0.704041	-0.752677	0.78649	-0.578105	-0.623742
Gluconic acid	0.515143	0.824102	0.631653	-0.579396	0.509437	0.827532	0.535123	-0.640932	-0.62266	0.488949	0.8393	0.616541	0.853343	0.580636	0.704041	1	-0.771169	0.485787	-0.37561	-0.557652
5β-cholest-22E-en-3β-ol	-0.678995	-0.739725	-0.711112	0.525575	-0.690276	-0.858153	-0.68276	0.828523	0.748976	-0.671842	-0.756888	-0.705927	-0.686137	-0.687954	-0.752677	-0.771169	1	-0.69252	0.63188	0.493632
Tauro-α-muricholic acid	0.991737	0.636616	0.95913	-0.522019	0.997043	0.669354	0.984656	-0.759162	-0.492839	0.997128	0.627737	0.556503	0.742434	0.973154	0.78649	0.485787	-0.69252	1	-0.44923	-0.681465
Psilocybine	-0.411353	-0.664807	-0.463726	0.485259	-0.440642	-0.581164	-0.370478	0.521606	0.414728	-0.400542	-0.652249	-0.659008	-0.463847	-0.374804	-0.578105	-0.37561	0.63188	-0.44923	1	0.384679
Maltotriose	-0.679514	-0.738357	-0.732198	0.759083	-0.686207	-0.641691	-0.684147	0.703377	0.500437	-0.678424	-0.735569	-0.461028	-0.854183	-0.700621	-0.623742	-0.557652	0.493632	-0.681465	0.384679	1

[truncated: 5 more sheets: Table S11, Table S12, Table S13, Table S14, Table S15]
